# Supplementary material
Source: Research Square preprint supplement (doi:10.21203/rs.3.rs-9539471/v1)
Supplement: Supplementary file 1 [file a80e01592bcdd5aa1b6036b2.pdf]

# Extended Display Items and Supplementary Material

## Misalignment between global disease burden and research efforts through the lens of sex/gender

Maximilian Bley, Leo Schmallenbach, Till W. Bärnighausen, Linda Mathez, Londa Schiebinger, Cassidy R. Sugimoto, Marc J. Lerchenmueller, Carolin Lerchenmüller

### Table of Contents

#### Extended Display Items

Extended Figure 1. Change in disease burden relative to 2000

Extended Figure 2. Age distribution of disease burden

Extended Figure 3. Analysis of sex/gender-specific disease causes

#### Supplementary Tables

Supplementary Table 1. Mapping of disease causes to MeSH terms and search strings

Supplementary Table 2. Socio-Demographic Index (SDI) classification for 204 countries

Supplementary Table 3. External validation of disease-to-research mapping

Supplementary Table 4. Summary of research profiles based on Journal Citation Reports categories

#### Supplementary Figures

Supplementary Figure 1. Customized large language model prompt used in Step 1

Supplementary Figure 2. Customized large language model prompt used in Step 2A

Supplementary Figure 3. Customized large language model prompt used in Step 2B

Supplementary Figure 4. Customized large language model prompt used in Step 3

Supplementary Figure 5. Distribution of the number of disease causes assigned per paper

Supplementary Figure 6. Customized large language model prompt for research type classification

Supplementary Figure 7. External validation of research type classification

## Extended Display Items

### Extended Figure 1. Change in disease burden relative to 2000

Overview of changes in disease burden relative to 2000. Values show changes for 2023 and projections for 2040 for mortality (years of life lost, YLL), disability (years lived with disability, YLD), and total burden (disability-adjusted life years, DALYs).

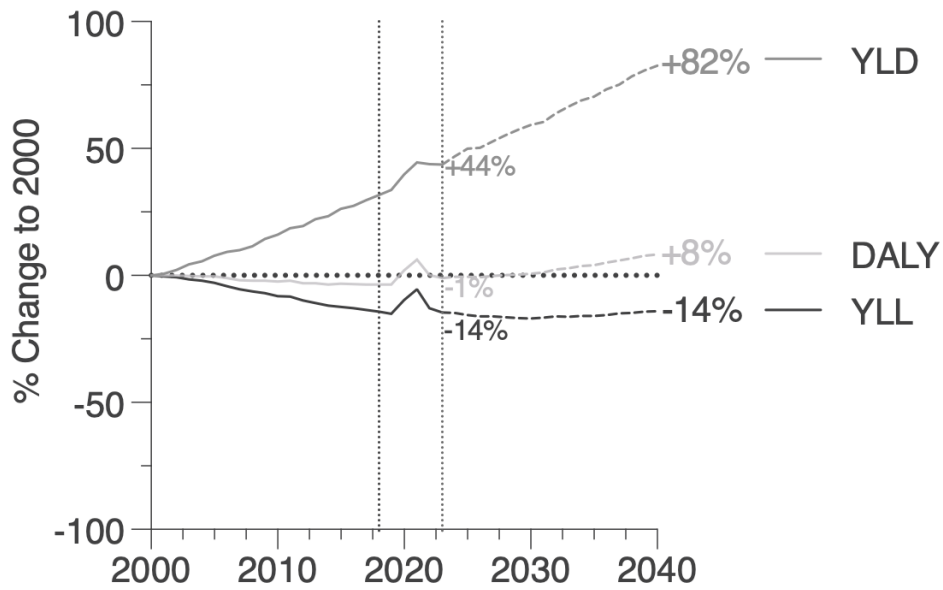

**Extended Figure 2. Age distribution of disease burden**

Overview of the distribution of disease burden across the life course, showing the share attributable to mortality (years of life lost, YLL) and disability (years lived with disability, YLD) across age groups.

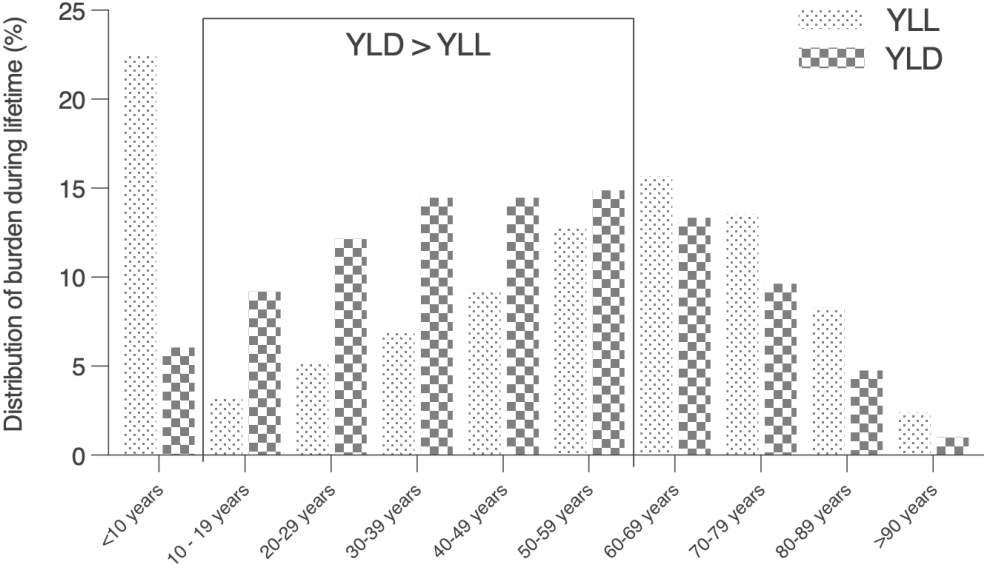

### Extended Figure 3. Analysis of sex/gender-specific disease causes

(A) Overview of research activity and disease burden for six women-specific (yellow) and two men-specific (blue) disease causes compared with disease causes affecting both men and women (grey). (B) The distribution of sex/gender-specific disease burden across disease causes for men (blue) and women (yellow).

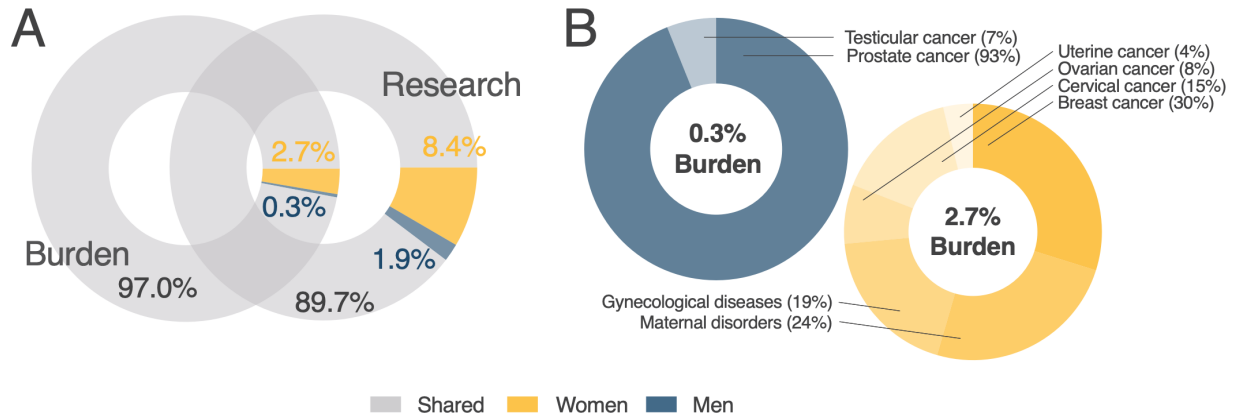

## Supplementary Material

### Section A. Mapping Between Disease Causes, MeSH Terms, and Search Strings

Supplementary Table 1. Mapping of disease causes to MeSH terms and search strings

| # | Rolled up Level 3 disease cause                              | Matched disease cause [String search terms]                                                                                                                                                                                                                                                                                                                                                                                                                                                        | MeSH terms                                                                                                                                                                                                                                                                                                                                                                                                                                                                                                                                                     |
|---|--------------------------------------------------------------|----------------------------------------------------------------------------------------------------------------------------------------------------------------------------------------------------------------------------------------------------------------------------------------------------------------------------------------------------------------------------------------------------------------------------------------------------------------------------------------------------|----------------------------------------------------------------------------------------------------------------------------------------------------------------------------------------------------------------------------------------------------------------------------------------------------------------------------------------------------------------------------------------------------------------------------------------------------------------------------------------------------------------------------------------------------------------|
| 1 | Acne vulgaris                                                | Acne vulgaris [Acne vulgaris]                                                                                                                                                                                                                                                                                                                                                                                                                                                                      | [Acne Conglobata], [Acne Vulgaris], [Adapalene, Benzoyl Peroxide Drug Combination]                                                                                                                                                                                                                                                                                                                                                                                                                                                                             |
| 2 | Acute glomerulonephritis                                     | Acute glomerulonephritis [Acute glomerulonephritis]                                                                                                                                                                                                                                                                                                                                                                                                                                                | [Glomerulonephritis]                                                                                                                                                                                                                                                                                                                                                                                                                                                                                                                                           |
| 3 | Acute Hepatitis & Cirrhosis and other chronic liver diseases | Acute hepatitis A [Acute hepatitis A]<br>Acute hepatitis B [Acute hepatitis B]<br>Acute hepatitis C [Acute hepatitis C]<br>Acute hepatitis E [Acute hepatitis E]<br>Chronic hepatitis B including cirrhosis [Chronic hepatitis B, Cirrhosis]<br>Chronic hepatitis C including cirrhosis [Chronic hepatitis C, Cirrhosis]<br>Cirrhosis due to alcohol [Cirrhosis due to alcohol]<br>Nonalcoholic fatty liver disease including cirrhosis [Nonalcoholic fatty liver disease, Nonalcoholic cirrhosis] | [Hepatitis A], [Hepatitis A virus], [Hepatitis E], [Hepatitis E virus], [Hepatovirus], [Hepevirus]<br>[Hepatitis B, Chronic], [Hepatitis C], [Hepatitis C, Chronic], [Avihepadnavirus], [Fatty Liver, Alcoholic], [HCV NS3-4A Protease Inhibitors], [Hepacivirus], [Hepadnaviridae Infections], [Hepatitis B], [Hepatitis B virus], [Hepatitis, Alcoholic], [Liver Cirrhosis, Alcoholic], [Non-alcoholic Fatty Liver Disease], [Orthohepadnavirus], [Simeprevir], [Sofosbuvir], [Sustained Virologic Response], [Telbivudine]                                  |
| 4 | African trypanosomiasis                                      | African trypanosomiasis [African trypanosomiasis]                                                                                                                                                                                                                                                                                                                                                                                                                                                  | [Eflornithine], [Melarsoprol], [Trypanosoma brucei gambiense], [Trypanosoma brucei rhodesiense], [Trypanosomiasis, African], [Variant Surface Glycoproteins, Trypanosoma]                                                                                                                                                                                                                                                                                                                                                                                      |
| 5 | Age-related and other hearing loss                           | Age-related and other hearing loss [Age-related hearing loss, Hearing loss]                                                                                                                                                                                                                                                                                                                                                                                                                        | [Cochlear Diseases], [Deafness], [Hearing Loss], [Hearing Loss, High-Frequency], [Hearing Loss, Mixed Conductive-Sensorineural], [Hearing Loss, Noise-Induced], [Hearing Loss, Sensorineural], [Labyrinthitis], [Meniere Disease], [Otosclerosis], [Presbycusis], [Tympanic Membrane Perforation], [Tympanosclerosis]                                                                                                                                                                                                                                          |
| 6 | Alcohol use disorders                                        | Alcohol use disorders [Alcohol use disorder]                                                                                                                                                                                                                                                                                                                                                                                                                                                       | [Alcohol Amnestic Disorder], [Alcohol Withdrawal Delirium], [Alcohol Withdrawal Seizures], [Alcohol-Induced Disorders], [Alcohol-Induced Disorders, Nervous System], [Alcohol-Related Disorders], [Alcoholic Intoxication], [Alcoholic Korsakoff Syndrome], [Alcoholic Neuropathy], [Alcoholism], [Binge Drinking], [Korsakoff Syndrome], [Liver Diseases, Alcoholic], [Psychoses, Alcoholic]                                                                                                                                                                  |
| 7 | Alopecia areata                                              | Alopecia areata [Alopecia areata]                                                                                                                                                                                                                                                                                                                                                                                                                                                                  | [Alopecia Areata]                                                                                                                                                                                                                                                                                                                                                                                                                                                                                                                                              |
| 8 | Alzheimer's disease and other dementias                      | Alzheimer's disease and other dementias [Alzheimer, Dementia]                                                                                                                                                                                                                                                                                                                                                                                                                                      | [Alexander Disease], [Alzheimer Disease], [Corticobasal Degeneration], [Dementia], [Dementia, Multi-Infarct], [Dementia, Vascular], [Frontotemporal Dementia], [Frontotemporal Lobar Degeneration], [Leigh Disease], [Lewy Body Disease], [Neurodegenerative Diseases], [Pick Disease of the Brain], [Subacute Combined Degeneration]                                                                                                                                                                                                                          |
| 9 | Anxiety disorders                                            | Anxiety disorders [Anxiety disorder]                                                                                                                                                                                                                                                                                                                                                                                                                                                               | [Adjustment Disorders], [Agoraphobia], [Anxiety], [Anxiety Disorders], [Anxiety, Separation], [Claustrophobia], [Conversion Disorder], [Dissociative Disorders], [Generalized Anxiety Disorder], [Hoarding Disorder], [Koro], [Obsessive-Compulsive Disorder], [Panic], [Panic Disorder], [Performance Anxiety], [Phobia, School], [Phobia, Social], [Phobic Disorders], [Psychogenic Nonepileptic Seizures], [Stress Disorders, Post-Traumatic], [Stress Disorders, Traumatic], [Stress Disorders, Traumatic, Acute], [Trauma and Stressor Related Disorders] |

|    |                                          |                                                                                                                                                                                                        |                                                                                                                                                                                                                                                                                                                                                                                                                                                                                                                                                                                                                                                                                                                                                                                                                                                                         |
|----|------------------------------------------|--------------------------------------------------------------------------------------------------------------------------------------------------------------------------------------------------------|-------------------------------------------------------------------------------------------------------------------------------------------------------------------------------------------------------------------------------------------------------------------------------------------------------------------------------------------------------------------------------------------------------------------------------------------------------------------------------------------------------------------------------------------------------------------------------------------------------------------------------------------------------------------------------------------------------------------------------------------------------------------------------------------------------------------------------------------------------------------------|
| 10 | Aortic aneurysm                          | Aortic aneurysm [Aortic aneurysm]                                                                                                                                                                      | [Aneurysm, Aortic Arch], [Aneurysm, Ascending Aorta], [Aortic Aneurysm], [Aortic Aneurysm, Abdominal], [Aortic Aneurysm, Thoracic], [Aortic Aneurysm, Thoracoabdominal], [Aortic Dissection], [Aortic Root Aneurysm], [Descending Thoracic Aortic Aneurysm]                                                                                                                                                                                                                                                                                                                                                                                                                                                                                                                                                                                                             |
| 11 | Appendicitis                             | Appendicitis [Appendicitis]                                                                                                                                                                            | [Appendicitis]                                                                                                                                                                                                                                                                                                                                                                                                                                                                                                                                                                                                                                                                                                                                                                                                                                                          |
| 12 | Asthma                                   | Asthma [Asthma]                                                                                                                                                                                        | [Asthma], [Cough-Variant Asthma], [Status Asthmaticus]                                                                                                                                                                                                                                                                                                                                                                                                                                                                                                                                                                                                                                                                                                                                                                                                                  |
| 13 | Atrial fibrillation and flutter          | Atrial fibrillation and flutter [Atrial fibrillation, Atrial flutter]                                                                                                                                  | [Atrial Fibrillation], [Atrial Flutter]                                                                                                                                                                                                                                                                                                                                                                                                                                                                                                                                                                                                                                                                                                                                                                                                                                 |
| 14 | Attention-deficit/hyperactivity disorder | Attention-deficit/hyperactivity disorder [Attention-deficit disorder, Hyperactivity disorder]                                                                                                          | [Attention Deficit Disorder with Hyperactivity]                                                                                                                                                                                                                                                                                                                                                                                                                                                                                                                                                                                                                                                                                                                                                                                                                         |
| 15 | Autism spectrum disorders                | Autism spectrum disorders [Autism spectrum disorder]                                                                                                                                                   | [Asperger Syndrome], [Autism Spectrum Disorder], [Autistic Disorder], [Child Development Disorders, Pervasive], [Rett Syndrome]                                                                                                                                                                                                                                                                                                                                                                                                                                                                                                                                                                                                                                                                                                                                         |
| 16 | Bacterial skin diseases                  | Cellulitis [Cellulitis]<br>Pyoderma [Pyoderma]                                                                                                                                                         | [Carbuncle], [Cellulitis], [Chylous Ascites], [Ecthyma], [Ecthyma, Contagious], [Erysipelas], [Erythrasma], [Fasciitis, Necrotizing], [Folliculitis], [Fournier Gangrene], [Furunculosis], [Impetigo], [Intertrigo], [Lymphangitis], [Orbital Cellulitis], [Paronychia], [Pilonidal Sinus], [Pinta], [Pyoderma], [Pyoderma Gangrenosum], [Skin Ulcer], [Staphylococcal Scalded Skin Syndrome], [Staphylococcal Skin Infections], [Sweet Syndrome], [Yaws]                                                                                                                                                                                                                                                                                                                                                                                                               |
| 17 | Bipolar disorder                         | Bipolar disorder [Bipolar disorder]                                                                                                                                                                    | [Bipolar Disorder], [Bipolar and Related Disorders], [Cyclothymic Disorder], [Mania]                                                                                                                                                                                                                                                                                                                                                                                                                                                                                                                                                                                                                                                                                                                                                                                    |
| 18 | Bladder cancer                           | Bladder cancer [Bladder cancer]                                                                                                                                                                        | [Carcinoma, Transitional Cell], [Non-Muscle Invasive Bladder Neoplasms], [Urinary Bladder Neoplasms]                                                                                                                                                                                                                                                                                                                                                                                                                                                                                                                                                                                                                                                                                                                                                                    |
| 19 | Blindness and vision loss                | Glaucoma [Glaucoma]<br>Cataract [Cataract]<br>Age-related macular degeneration [Age-related macular degeneration]<br>Refraction disorders [Refraction disorder]<br>Near vision loss [Near vision loss] | [Anisometropia], [Antiglaucoma Agents], [Aphakia], [Aphakia, Postcataract], [Astigmatism], [Brimonidine Tartrate, Timolol Maleate Drug Combination], [Capsule Opacification], [Cataract], [Cataract Extraction], [Corneal Wavefront Aberration], [Filtering Surgery], [Geographic Atrophy], [Glaucoma], [Glaucoma, Angle-Closure], [Glaucoma, Neovascular], [Glaucoma, Open-Angle], [Hyperopia], [Lens Cortex, Crystalline], [Lens Diseases], [Lens Nucleus, Crystalline], [Low Tension Glaucoma], [Macular Degeneration], [Molteno Implants], [Myopia], [Myopia, Degenerative], [Ocular Hypertension], [Orthokeratologic Procedures], [Polypoidal Choroidal Vasculopathy], [Posterior Capsulotomy], [Presbyopia], [Ranibizumab], [Refraction, Ocular], [Refractive Errors], [Retinal Drusen], [Trabeculectomy], [Vision, Low], [Wet Macular Degeneration], [Blindness] |
| 20 | Brain and central nervous system cancer  | Brain and central nervous system cancer [Brain cancer, Central nervous system cancer]                                                                                                                  | [Brain Neoplasms], [Brain Stem Neoplasms], [Cerebral Ventricle Neoplasms], [Diffuse Intrinsic Pontine Glioma], [Ependymoma], [Esthesioneuroblastoma, Olfactory], [Glioblastoma], [Glioma], [Gliosarcoma], [Hypothalamic Neoplasms], [Medulloblastoma], [Oligodendroglioma], [Optic Nerve Neoplasms], [Spinal Cord Neoplasms]                                                                                                                                                                                                                                                                                                                                                                                                                                                                                                                                            |
| 21 | Breast cancer                            | Breast cancer [Breast cancer]                                                                                                                                                                          | [Ado-Trastuzumab Emtansine], [Breast Carcinoma In Situ], [Breast Neoplasms], [Breast Neoplasms, Male], [Carcinoma, Ductal, Breast], [Carcinoma, Intraductal, Noninfiltrating], [Carcinoma, Lobular], [Fulvestrant], [Inflammatory Breast Neoplasms], [Lapatinib], [Mammaglobin A], [Mastectomy, Extended Radical], [Mastectomy, Modified Radical], [Mastectomy, Radical], [Mastectomy, Segmental], [Mastectomy, Simple], [Mastectomy, Subcutaneous], [Neoplasms, Ductal, Lobular, and Medullary], [Paget's Disease, Mammary], [Phyllodes Tumor], [Triple Negative Breast Neoplasms], [Unilateral Breast Neoplasms]                                                                                                                                                                                                                                                      |
| 22 | Cardiomyopathy and myocarditis           | Myocarditis [Myocarditis]<br>Alcoholic cardiomyopathy [Alcoholic cardiomyopathy]                                                                                                                       | [Cardiomyopathies], [Myocarditis], [Cardiomyopathy, Alcoholic]                                                                                                                                                                                                                                                                                                                                                                                                                                                                                                                                                                                                                                                                                                                                                                                                          |
| 23 | Cervical cancer                          | Cervical cancer [Cervical cancer]                                                                                                                                                                      | [Human Papillomavirus Recombinant Vaccine Quadrivalent, Types 6, 11, 16, 18], [Human papillomavirus 18], [Papanicolaou Test], [Squamous Intraepithelial Lesions of the Cervix], [Trachelectomy], [Uterine Cervical Neoplasms]                                                                                                                                                                                                                                                                                                                                                                                                                                                                                                                                                                                                                                           |
| 24 | Chagas disease                           | Chagas disease [Chagas disease]                                                                                                                                                                        | [Chagas Cardiomyopathy], [Chagas Disease], [Nifurtimox], [Panstrongylus], [Triatoma], [Triatominae], [Trypanosoma cruzi], [Trypanosomiasis]                                                                                                                                                                                                                                                                                                                                                                                                                                                                                                                                                                                                                                                                                                                             |
| 25 | Chronic kidney disease                   | Chronic kidney disease [Chronic kidney disease]                                                                                                                                                        | [Balkan Nephropathy], [Dent Disease], [Glomerulonephritis, Membranous], [Glomerulosclerosis, Focal Segmental], [Kidney Failure, Chronic], [Lupus Nephritis], [Nephritis], [Nephritis, Hereditary], [Nephrosclerosis], [Nephrosis, Lipoid], [Nephrotic Syndrome], [Polycystic Kidney Diseases], [Polycystic Kidney, Autosomal Dominant], [Renal Insufficiency, Chronic], [Solitary Kidney], [Uremia]                                                                                                                                                                                                                                                                                                                                                                                                                                                                     |

|    |                                               |                                                                                                                                                                                                                                                                                                                                                                                                                                         |                                                                                                                                                                                                                                                                                                                                                                                                                                                                                                                                                                                                                                                                                                                                                                                                                                                                                                                                                                                                                                                                                                                                                                                                                                                                                                                                                                                                                                                                                                                                                                                                                                                                                                                                                                                                                                                                                                                                                                                                                                                                                                                                                                                                                                                                                                                                                                                                                                                                                                                                                                                                                                                                                                                                                                                                                                                                                                                                                                                                                                                                                                                                                                                                                                                                                                                                                                                                                                                                                                                                                                                                                                                                                                                                                                                                                                                                                                                                                                                                                                                                                                                                                                                                                                                                                                                                                                                                                                                                                                                                                                                                                                                                                                                                                                                                                                                                                                                                                          |
|----|-----------------------------------------------|-----------------------------------------------------------------------------------------------------------------------------------------------------------------------------------------------------------------------------------------------------------------------------------------------------------------------------------------------------------------------------------------------------------------------------------------|----------------------------------------------------------------------------------------------------------------------------------------------------------------------------------------------------------------------------------------------------------------------------------------------------------------------------------------------------------------------------------------------------------------------------------------------------------------------------------------------------------------------------------------------------------------------------------------------------------------------------------------------------------------------------------------------------------------------------------------------------------------------------------------------------------------------------------------------------------------------------------------------------------------------------------------------------------------------------------------------------------------------------------------------------------------------------------------------------------------------------------------------------------------------------------------------------------------------------------------------------------------------------------------------------------------------------------------------------------------------------------------------------------------------------------------------------------------------------------------------------------------------------------------------------------------------------------------------------------------------------------------------------------------------------------------------------------------------------------------------------------------------------------------------------------------------------------------------------------------------------------------------------------------------------------------------------------------------------------------------------------------------------------------------------------------------------------------------------------------------------------------------------------------------------------------------------------------------------------------------------------------------------------------------------------------------------------------------------------------------------------------------------------------------------------------------------------------------------------------------------------------------------------------------------------------------------------------------------------------------------------------------------------------------------------------------------------------------------------------------------------------------------------------------------------------------------------------------------------------------------------------------------------------------------------------------------------------------------------------------------------------------------------------------------------------------------------------------------------------------------------------------------------------------------------------------------------------------------------------------------------------------------------------------------------------------------------------------------------------------------------------------------------------------------------------------------------------------------------------------------------------------------------------------------------------------------------------------------------------------------------------------------------------------------------------------------------------------------------------------------------------------------------------------------------------------------------------------------------------------------------------------------------------------------------------------------------------------------------------------------------------------------------------------------------------------------------------------------------------------------------------------------------------------------------------------------------------------------------------------------------------------------------------------------------------------------------------------------------------------------------------------------------------------------------------------------------------------------------------------------------------------------------------------------------------------------------------------------------------------------------------------------------------------------------------------------------------------------------------------------------------------------------------------------------------------------------------------------------------------------------------------------------------------------------------------------------|
| 26 | Chronic obstructive pulmonary disease         | Chronic obstructive pulmonary disease [Chronic obstructive pulmonary disease]                                                                                                                                                                                                                                                                                                                                                           | [Bronchitis, Chronic], [Emphysema], [Pulmonary Disease, Chronic Obstructive], [Pulmonary Emphysema]                                                                                                                                                                                                                                                                                                                                                                                                                                                                                                                                                                                                                                                                                                                                                                                                                                                                                                                                                                                                                                                                                                                                                                                                                                                                                                                                                                                                                                                                                                                                                                                                                                                                                                                                                                                                                                                                                                                                                                                                                                                                                                                                                                                                                                                                                                                                                                                                                                                                                                                                                                                                                                                                                                                                                                                                                                                                                                                                                                                                                                                                                                                                                                                                                                                                                                                                                                                                                                                                                                                                                                                                                                                                                                                                                                                                                                                                                                                                                                                                                                                                                                                                                                                                                                                                                                                                                                                                                                                                                                                                                                                                                                                                                                                                                                                                                                                      |
| 27 | Colon and rectum cancer                       | Colon and rectum cancer [Colon cancer, Rectum cancer]                                                                                                                                                                                                                                                                                                                                                                                   | [Aberrant Crypt Foci], [Adenomatous Polyposis Coli], [Adenomatous Polyps], [Cecal Neoplasms], [Colitis-Associated Neoplasms], [Colonic Neoplasms], [Colorectal Neoplasms], [Colorectal Neoplasms, Hereditary Nonpolyposis], [Gardner Syndrome], [Lynch Syndrome II], [Rectal Neoplasms], [Sigmoid Neoplasms]                                                                                                                                                                                                                                                                                                                                                                                                                                                                                                                                                                                                                                                                                                                                                                                                                                                                                                                                                                                                                                                                                                                                                                                                                                                                                                                                                                                                                                                                                                                                                                                                                                                                                                                                                                                                                                                                                                                                                                                                                                                                                                                                                                                                                                                                                                                                                                                                                                                                                                                                                                                                                                                                                                                                                                                                                                                                                                                                                                                                                                                                                                                                                                                                                                                                                                                                                                                                                                                                                                                                                                                                                                                                                                                                                                                                                                                                                                                                                                                                                                                                                                                                                                                                                                                                                                                                                                                                                                                                                                                                                                                                                                             |
| 28 | Conduct disorder                              | Conduct disorder [Conduct disorder]                                                                                                                                                                                                                                                                                                                                                                                                     | [Conduct Disorder], [Oppositional Defiant Disorder]                                                                                                                                                                                                                                                                                                                                                                                                                                                                                                                                                                                                                                                                                                                                                                                                                                                                                                                                                                                                                                                                                                                                                                                                                                                                                                                                                                                                                                                                                                                                                                                                                                                                                                                                                                                                                                                                                                                                                                                                                                                                                                                                                                                                                                                                                                                                                                                                                                                                                                                                                                                                                                                                                                                                                                                                                                                                                                                                                                                                                                                                                                                                                                                                                                                                                                                                                                                                                                                                                                                                                                                                                                                                                                                                                                                                                                                                                                                                                                                                                                                                                                                                                                                                                                                                                                                                                                                                                                                                                                                                                                                                                                                                                                                                                                                                                                                                                                      |
| 29 | Congenital birth defects & Neonatal disorders | Congenital birth defects [Congenital birth defect]<br>Neonatal preterm birth [Neonatal preterm birth]<br>Neonatal encephalopathy due to birth asphyxia and trauma [Neonatal encephalopathy due to birth asphyxia, Neonatal encephalopathy due to trauma]<br>Neonatal sepsis and other neonatal infections [Neonatal sepsis, Neonatal infection]<br>Hemolytic disease and other neonatal jaundice [Hemolytic disease, Neonatal jaundice] | [Cholechal Cyst], [Hydrophthalmos], [22q11 Deletion Syndrome], [46, XX Disorders of Sex Development], [Achondroplasia], [Acrocallosal Syndrome], [Acrocephalosyndactylia], [Agenesis of Corpus Callosum], [Aicardi Syndrome], [Alagille Syndrome], [Alstrom Syndrome], [Amniotic Band Syndrome], [Anencephaly], [Angelman Syndrome], [Aniridia], [Ankyloglossia], [Anomalous Left Coronary Artery], [Anophthalmos], [Anorectal Malformations], [Antley-Bixler Syndrome Phenotype], [Anus, Imperforate], [Aortic Coarctation], [Aortic Stenosis, Supraaortic], [Aortico-Ventricular Tunnel], [Aortopulmonary Septal Defect], [Arachnodactyly], [Arnold-Chiari Malformation], [Arthrogyposis], [Bardet-Biedl Syndrome], [Barth Syndrome], [Beckwith-Wiedemann Syndrome], [Bicornuate Uterus], [Bicuspid Aortic Valve Disease], [Biliary Atresia], [Bladder Exstrophy], [Bland White Garland Syndrome], [Blepharophimosis], [Bloom Syndrome], [Bloom Syndrome], [Brachydactyly], [Branchio-Oto-Renal Syndrome], [Bronchogenic Cyst], [Bronchopulmonary Sequestration], [CHARGE Syndrome], [Campomelic Dysplasia], [Camurati-Engelmann Syndrome], [Cervical Rib], [Cherubism], [Choanal Atresia], [Chondrodysplasia Punctata], [Chondrodysplasia Punctata, Rhizomelic], [Chromosome Disorders], [Chromosomes, Human, Pair 21], [Classical Lissencephalies and Subcortical Band Heterotopias], [Cleft Lip], [Cleft Palate], [Cleidocranial Dysplasia], [Cloaca], [Cloacal Exstrophy], [Clubfoot], [Cobblestone Lissencephaly], [Coffin-Lowry Syndrome], [Coloboma], [Congenital Abnormalities], [Congenital Cranial Dysinnervation Disorders], [Congenital Microtia], [Congenital Portosystemic Shunt], [Congenitally Corrected Transposition of the Great Arteries], [Cor Triatriatum], [Costello Syndrome], [Craniofacial Abnormalities], [Craniofacial Dysostosis], [Cleft Lip], [Cleft Palate], [Cri-du-Chat Syndrome], [Crisscross Heart], [Cryptorchidism], [Cutis Laxa], [Cystic Adenomatoid Malformation of Lung, Congenital], [Dandy-Walker Syndrome], [De Lange Syndrome], [Denys-Drash Syndrome], [Developmental Dysplasia of the Hip], [Dextrocardia], [DiGeorge Syndrome], [Diaphragmatic Eventration], [Discrete Subaortic Stenosis], [Disorder of Sex Development, 46,XY], [Disorders of Sex Development], [Donohue Syndrome], [Double Outlet Right Ventricle], [Down Syndrome], [Duane Retraction Syndrome], [Ductus Arteriosus, Patent], [Dyskeratosis Congenita], [Dysostoses], [Ebstein Anomaly], [Ectodermal Dysplasia], [Ectodermal Dysplasia 1, Anhidrotic], [Ectodermal Dysplasia 3, Anhidrotic], [Ectodermal Dysplasia, Hypohidrotic, Autosomal Recessive], [Ectopia Cordis], [Ectopia Lentis], [Ehlers-Danlos Syndrome], [Eisenmenger Complex], [Ellis-Van Creveld Syndrome], [Encephalocele], [Enchondromatosis], [Endocardial Cushion Defects], [Endocardial Fibroelastosis], [Epidermolysis Bullosa], [Epidermolysis Bullosa Dystrophica], [Epidermolysis Bullosa Simplex], [Epidermolysis Bullosa, Junctional], [Epispadias], [Esophageal Atresia], [Exostoses, Multiple Hereditary], [Fanconi Anemia], [Fetal Alcohol Spectrum Disorders], [Fibrous Dysplasia, Polyostotic], [Focal Dermal Hypoplasia], [Focal Facial Dysplasias], [Foot Deformities, Congenital], [Foramen Ovale, Patent], [Fragile X Syndrome], [Fraser Syndrome], [Frasier Syndrome], [Funnel Chest], [Fused Kidney], [Gastroschisis], [Glossoptosis], [Goldenhar Syndrome], [Gonadal Dysgenesis, 46,XY], [Gonadal Dysgenesis, Mixed], [Gynatresia], [Hajdu-Cheney Syndrome], [Hallermann's Syndrome], [Hand Deformities, Congenital], [Heart Defects, Congenital], [Heart Septal Defects], [Heart Septal Defects, Atrial], [Heart Septal Defects, Ventricular], [Hemangioma, Capillary], [Hemimegalencephaly], [Hernias, Diaphragmatic, Congenital], [Heterotaxy Syndrome], [Hip Dislocation, Congenital], [Hirschsprung Disease], [Holoprosencephaly], [Hydranencephaly], [Hyperkeratosis, Epidermolytic], [Hyperostosis, Cortical, Congenital], [Hypertelorism], [Hypophosphatasia], [Hypoplastic Left Heart Syndrome], [Hypospadias], [Ichthyosiform Erythroderma, Congenital], [Ichthyosis Vulgaris], [Ichthyosis, Lamellar], [Ichthyosis, X-Linked], [Incontinentia Pigmenti], [Intestinal Atresia], [Intracranial Arteriovenous Malformations], [Jacobsen Distal 11q Deletion Syndrome], [Kartagener Syndrome], [Kidney Diseases, Cystic], [Klinefelter Syndrome], [Klippel-Feil Syndrome], [Klippel-Trenaunay-Weber Syndrome], [LEOPARD Syndrome], [Langer-Giedion Syndrome], [Laryngocele], [Laryngomalacia], [Leber Congenital Amaurosis], [Levocardia], [Limb Deformities, Congenital], [Lipoid Proteinosis of Urbach and Wiethe], [Lissencephaly], [Loeys-Dietz Syndrome], [Lower Extremity Deformities, Congenital], [Lymphangioma], [Lymphangioma, Cystic], [Macrostomia], [Malformations of Cortical Development], [Malformations of Cortical |

Development, Group I], [Malformations of Cortical Development, Group II], [Malformations of Cortical Development, Group III], [Mandibulofacial Dysostosis], [Marfan Syndrome], [Mastocytosis], [Maxillofacial Abnormalities], [Meckel Diverticulum], [Medullary Sponge Kidney], [Megalencephaly], [Meningocele], [Meningomyelocele], [Menkes Kinky Hair Syndrome], [Metatarsus Varus], [Microcephaly], [Micrognathism], [Microphthalmos], [Microstomia], [Mobius Syndrome], [Monilethrix], [Mulibrey Nanism], [Multicystic Dysplastic Kidney], [Nail-Patella Syndrome], [Nervous System Malformations], [Neural Tube Defects], [Neurocutaneous Syndromes], [Neurofibromatosis 1], [Neurofibromatosis 2], [Nijmegen Breakage Syndrome], [Noonan Syndrome], [Norwood Procedures], [OEIS Complex], [Oculocerebrorenal Syndrome], [Optic Nerve Hypoplasia], [Orofaciodigital Syndromes], [Osteochondrodysplasias], [Osteogenesis Imperfecta], [Osteopetrosis], [Osteopikilosis], [Osteosclerosis], [Ovotesticular Disorders of Sex Development], [Pachyonychia Congenita], [Pallister-Hall Syndrome], [Pancreas Divisum], [Parovarian Cyst], [Pectus Carinatum], [Pemphigus, Benign Familiar], [Pentology of Cantrell], [Periventricular Nodular Heterotopia], [Persistent Hyperplastic Primary Vitreous], [Persistent Left Superior Vena Cava], [Piebaldism], [Pierre Robin Syndrome], [Plagiocephaly], [Plagiocephaly, Nonsynostotic], [Platybasia], [Poland Syndrome], [Polycystic Kidney, Autosomal Recessive], [Polydactyly], [Polymicrogyria], [Porencephaly], [Port-Wine Stain], [Proteus Syndrome], [Prune Belly Syndrome], [Pulmonary Atrisia], [Pulmonary Subvalvular Stenosis], [Pulmonary Valve Stenosis], [Pycnodysostosis], [Pyloric Stenosis], [Pyloric Stenosis, Hypertrophic], [Quadracuspid Aortic Valve], [Retinal Dysplasia], [Retrocaval Ureter], [Retrognathia], [Rothmund-Thomson Syndrome], [Rubella Syndrome, Congenital], [Rubinstein-Taybi Syndrome], [Schizencephaly], [Scimitar Syndrome], [Septate Uterus], [Septo-Optic Dysplasia], [Sex Chromosome Disorders of Sex Development], [Short Rib-Polydactyly Syndrome], [Shwachman-Diamond Syndrome], [Silver-Russell Syndrome], [Single Umbilical Artery], [Situs Inversus], [Smith-Lemli-Opitz Syndrome], [Smith-Magenis Syndrome], [Sotos Syndrome], [Spina Bifida Cystica], [Spina Bifida Occulta], [Spinal Dysraphism], [Sturge-Weber Syndrome], [Syndactyly], [Synostosis], [Talipes], [Tarsal Coalition], [Telangiectasia, Hereditary Hemorrhagic], [Tetralogy of Fallot], [Thalidomide], [Thanatophoric Dysplasia], [Thyroglossal Cyst], [Tooth, Supernumerary], [Tracheobronchomegaly], [Tracheoesophageal Fistula], [Transposition of Great Vessels], [Tricuspid Atrisia], [Trilogy of Fallot], [Triploidy], [Trisomy 13 Syndrome], [Trisomy 18 Syndrome], [Truncus Arteriosus], [Truncus Arteriosus, Persistent], [Tuberous Sclerosis], [Turner Syndrome], [Twins, Conjoined], [Univentricular Heart], [Upper Extremity Deformities, Congenital], [Urachal Cyst], [Uterine Didelphys], [Uterine Duplication Anomalies], [Vascular Ring], [Vein of Galen Malformations], [Ventricular Outflow Obstruction, Right], [WAGR Syndrome], [Walker-Warburg Syndrome], [Weill-Marchesani Syndrome], [Williams Syndrome], [Wolf-Hirschhorn Syndrome], [XYY Karyotype], [Xeroderma Pigmentosum], [Zellweger Syndrome], [Enterocolitis, Necrotizing], [Asphyxia Neonatorum], [Birth Injuries], [Blood Group Incompatibility], [Bronchopulmonary Dysplasia], [Citrobacter koseri], [Cronobacter], [Erythroblastosis, Fetal], [Exchange Transfusion, Whole Blood], [Fetal Growth Retardation], [Fetal Hypoxia], [Fetal Membranes, Premature Rupture], [Hyaline Membrane Disease], [Hyperbilirubinemia, Neonatal], [Hypoxia-Ischemia, Brain], [Infant, Premature, Diseases], [Jaundice, Neonatal], [Kernicterus], [Leukomalacia, Periventricular], [Meconium Aspiration Syndrome], [Neonatal Sepsis], [Obstetric Labor, Premature], [Ophthalmia Neonatorum], [Premature Birth], [Respiratory Distress Syndrome, Newborn], [Retinopathy of Prematurity], [Rh Isoimmunization], [Rho(D) Immune Globulin], [Sclerema Neonatorum], [Streptococcus agalactiae], [Transient Tachypnea of the Newborn]

|    |                       |                                                                                                                                   |                                                                                                                                                                                                                                                                                                                                                                                                                                                                                                                   |
|----|-----------------------|-----------------------------------------------------------------------------------------------------------------------------------|-------------------------------------------------------------------------------------------------------------------------------------------------------------------------------------------------------------------------------------------------------------------------------------------------------------------------------------------------------------------------------------------------------------------------------------------------------------------------------------------------------------------|
| 30 | Cystic echinococcosis | Cystic echinococcosis [Cystic echinococcosis]                                                                                     | [Echinococcosis], [Echinococcosis, Hepatic], [Echinococcosis, Pulmonary], [Echinococcus granulosus]                                                                                                                                                                                                                                                                                                                                                                                                               |
| 31 | Cysticercosis         | Cysticercosis [Cysticercosis]                                                                                                     | [Cysticercosis], [Cysticercus], [Neurocysticercosis], [Taenia solium]                                                                                                                                                                                                                                                                                                                                                                                                                                             |
| 32 | Decubitus ulcer       | Decubitus ulcer [Decubitus ulcer]                                                                                                 | [Pressure Ulcer]                                                                                                                                                                                                                                                                                                                                                                                                                                                                                                  |
| 33 | Dengue                | Dengue [Dengue]                                                                                                                   | [Dengue], [Severe Dengue]                                                                                                                                                                                                                                                                                                                                                                                                                                                                                         |
| 34 | Depressive disorders  | Major depressive disorder [Major depressive disorder]<br>Dysthymia [Dysthymia]                                                    | [Depression], [Depressive Disorder], [Depressive Disorder, Major], [Depressive Disorder, Treatment-Resistant], [Dysthymic Disorder], [Seasonal Affective Disorder]                                                                                                                                                                                                                                                                                                                                                |
| 35 | Dermatitis            | Atopic dermatitis [Atopic dermatitis]<br>Contact dermatitis [Contact dermatitis]<br>Seborrheic dermatitis [Seborrheic dermatitis] | [Acrylates], [Bufexamac], [Dandruff], [Dermatitis, Allergic Contact], [Dermatitis, Atopic], [Dermatitis, Contact], [Dermatitis, Irritant], [Dermatitis, Occupational], [Dermatitis, Seborrheic], [Dermatitis, Toxicodendron], [Diaper Rash], [Dinitrochlorobenzene], [Dinitrofluorobenzene], [Epoxy Resins], [Latex Hypersensitivity], [Maleic Anhydrides], [Oxazolone], [Parthenium hysterophorus], [Patch Tests], [Phenylenediamines], [Picryl Chloride], [Potassium Dichromate], [Toxicodendron], [Dermatitis] |

|    |                                      |                                                                                                            |                                                                                                                                                                                                                                                                                                                                                                                                                                                                                                                                                                                                                                                                                                                                                                                                                                                                                                                                                                                                                                                                                                                                                                           |
|----|--------------------------------------|------------------------------------------------------------------------------------------------------------|---------------------------------------------------------------------------------------------------------------------------------------------------------------------------------------------------------------------------------------------------------------------------------------------------------------------------------------------------------------------------------------------------------------------------------------------------------------------------------------------------------------------------------------------------------------------------------------------------------------------------------------------------------------------------------------------------------------------------------------------------------------------------------------------------------------------------------------------------------------------------------------------------------------------------------------------------------------------------------------------------------------------------------------------------------------------------------------------------------------------------------------------------------------------------|
| 36 | Diabetes mellitus                    | Diabetes mellitus type 1 [Diabetes mellitus type 1]<br>Diabetes mellitus type 2 [Diabetes mellitus type 2] | [Canagliflozin], [Diabetes Mellitus, Type 1], [Diabetes Mellitus, Type 2], [Dipeptidyl-Peptidase IV Inhibitors], [Exenatide], [Glipizide], [Hyperglycemic Hyperosmolar Nonketotic Coma], [Islets of Langerhans Transplantation], [Linagliptin], [Nateglinide], [Pioglitazone], [Prediabetic State], [Rosiglitazone], [Sitagliptin Phosphate], [Sitagliptin Phosphate, Metformin Hydrochloride Drug Combination], [Sodium-Glucose Transporter 2 Inhibitors], [Tirzepatide], [Tolazamide], [Vildagliptin], [Diabetes Mellitus]                                                                                                                                                                                                                                                                                                                                                                                                                                                                                                                                                                                                                                              |
| 37 | Diarrheal diseases                   | Diarrheal diseases [Diarrheal disease]                                                                     | [Enteritis], [Gastroenteritis], [Aeromonas hydrophila], [Amebiasis], [Astroviridae], [Astroviridae Infections], [Balantidiasis], [Botulism], [Caliciviridae Infections], [Campylobacter coli], [Campylobacter jejuni], [Campylobacter upsaliensis], [Campylobacteraceae], [Cholera], [Clostridioides difficile], [Cryptosporidiosis], [Cryptosporidium parvum], [Cyclosporiasis], [Diarrhea], [Diarrhea, Infantile], [Dysentery, Bacillary], [Enterocolitis], [Giardiasis], [Isosporiasis], [Kobuvirus], [Liver Abscess, Amebic], [Norovirus], [Norwalk virus], [Plesiomonas], [Rehydration Solutions], [Rotavirus], [Rotavirus Infections], [Salmonella], [Salmonella Food Poisoning], [Salmonella Infections], [Salmonella arizonae], [Salmonella enterica], [Salmonella enteritidis], [Salmonella typhimurium], [Sapovirus], [Sarcocystosis], [Staphylococcal Food Poisoning], [Torovirus], [Torovirus Infections], [Vibrio cholerae], [Vibrio cholerae O1], [Vibrio cholerae O139]                                                                                                                                                                                    |
| 38 | Dietary iron deficiency              | Dietary iron deficiency [Dietary iron deficiency]                                                          | [Anemia, Hypochromic], [Anemia, Iron-Deficiency], [Iron Deficiencies], [Plummer-Vinson Syndrome]                                                                                                                                                                                                                                                                                                                                                                                                                                                                                                                                                                                                                                                                                                                                                                                                                                                                                                                                                                                                                                                                          |
| 39 | Diphtheria                           | Diphtheria [Diphtheria]                                                                                    | [Corynebacterium diphtheriae], [Diphtheria]                                                                                                                                                                                                                                                                                                                                                                                                                                                                                                                                                                                                                                                                                                                                                                                                                                                                                                                                                                                                                                                                                                                               |
| 40 | Eating disorders                     | Anorexia nervosa [Anorexia nervosa]<br>Bulimia nervosa [Bulimia nervosa]                                   | [Anorexia Nervosa], [Binge-Eating Disorder], [Bulimia], [Bulimia Nervosa]                                                                                                                                                                                                                                                                                                                                                                                                                                                                                                                                                                                                                                                                                                                                                                                                                                                                                                                                                                                                                                                                                                 |
| 41 | Encephalitis                         | Encephalitis [Encephalitis]                                                                                | [Acute Febrile Encephalopathy], [Anti-N-Methyl-D-Aspartate Receptor Encephalitis], [Borna Disease], [Encephalitis], [Encephalitis Virus, California], [Encephalitis Virus, Eastern Equine], [Encephalitis Virus, Japanese], [Encephalitis Virus, Murray Valley], [Encephalitis Virus, St. Louis], [Encephalitis Virus, Venezuelan Equine], [Encephalitis Virus, Western Equine], [Encephalitis Viruses], [Encephalitis Viruses, Japanese], [Encephalitis Viruses, Tick-Borne], [Encephalitis, Arbovirus], [Encephalitis, California], [Encephalitis, Herpes Simplex], [Encephalitis, Japanese], [Encephalitis, St. Louis], [Encephalitis, Tick-Borne], [Encephalitis, Viral], [Encephalomyelitis, Eastern Equine], [Encephalomyelitis, Venezuelan Equine], [Encephalomyelitis, Western Equine], [Infectious Encephalitis], [La Crosse virus], [Leukoencephalitis, Acute Hemorrhagic], [Limbic Encephalitis], [Louping Ill], [Meningoencephalitis], [Naegleria fowleri], [Paraparesis, Tropical Spastic], [Parkinson Disease, Postencephalitic], [SSPE Virus], [Semliki forest virus], [Subacute Sclerosing Panencephalitis], [Toxoplasmosis, Cerebral], [West Nile virus] |
| 42 | Endocarditis                         | Endocarditis [Endocarditis]                                                                                | [Endocarditis], [Endocarditis, Bacterial], [Endocarditis, Non-Infective], [Endocarditis, Subacute Bacterial]                                                                                                                                                                                                                                                                                                                                                                                                                                                                                                                                                                                                                                                                                                                                                                                                                                                                                                                                                                                                                                                              |
| 43 | Esophageal cancer                    | Esophageal cancer [Esophageal cancer]                                                                      | [Esophageal Neoplasms], [Esophageal Squamous Cell Carcinoma]                                                                                                                                                                                                                                                                                                                                                                                                                                                                                                                                                                                                                                                                                                                                                                                                                                                                                                                                                                                                                                                                                                              |
| 44 | Eye cancer                           | Retinoblastoma [Retinoblastoma]                                                                            | [Retinoblastoma]                                                                                                                                                                                                                                                                                                                                                                                                                                                                                                                                                                                                                                                                                                                                                                                                                                                                                                                                                                                                                                                                                                                                                          |
| 45 | Food-borne trematodiasis             | Food-borne trematodiasis [Food-borne trematodiasis]                                                        | [Clonorchiasis], [Clonorchis sinensis], [Dicrocoeliasis], [Dicrocoelium], [Echinostoma], [Echinostomatidae], [Echinostomiasis], [Fasciola], [Fasciola hepatica], [Fascioliasis], [Fasciolidae], [Fascioloidiasis], [Heterophyidae], [Opisthorchiasis], [Opisthorchidae], [Opisthorchis], [Paragonimiasis], [Paragonimus], [Paragonimus westermani], [Trematode Infections], [Troglotrematidae]                                                                                                                                                                                                                                                                                                                                                                                                                                                                                                                                                                                                                                                                                                                                                                            |
| 46 | Fungal skin diseases                 | Fungal skin diseases [Fungal skin disease]                                                                 | [Arthrodermataceae], [Candidiasis, Cutaneous], [Chromoblastomycosis], [Dermatomycoses], [Epidermophyton], [Lobomycosis], [Microsporum], [Onychomycosis], [Otomycosis], [Piedra], [Sporotrichosis], [Tinea], [Tinea Capitis], [Tinea Cruris], [Tinea Favosa], [Tinea Pedis], [Tinea Versicolor], [Trichophyton]                                                                                                                                                                                                                                                                                                                                                                                                                                                                                                                                                                                                                                                                                                                                                                                                                                                            |
| 47 | Gallbladder and biliary diseases     | Gallbladder and biliary diseases [Gallbladder disease, Biliary disease]                                    | [Acalculous Cholecystitis], [Bile Duct Diseases], [Biliary Dyskinesia], [Biliary Fistula], [Biliary Tract Diseases], [Caroli Disease], [Cholangitis], [Cholangitis, Sclerosing], [Cholecystitis], [Cholecystitis, Acute], [Cholecystolithiasis], [Cholelithiasis], [Cholestasis], [Cholestasis, Extrahepatic], [Cholestasis, Intrahepatic], [Common Bile Duct Diseases], [Emphysematous Cholecystitis], [Gallbladder Diseases], [Gallstones], [Hemobilia], [Mirizzi Syndrome], [Postcholecystectomy Syndrome], [Sphincter of Oddi Dysfunction]                                                                                                                                                                                                                                                                                                                                                                                                                                                                                                                                                                                                                            |
| 48 | Gallbladder and biliary tract cancer | Gallbladder and biliary tract cancer [Gallbladder cancer, Biliary tract cancer]                            | [Cholangiocarcinoma], [Bile Duct Neoplasms], [Biliary Tract Neoplasms], [Common Bile Duct Neoplasms], [Gallbladder Neoplasms], [Klatskin Tumor]                                                                                                                                                                                                                                                                                                                                                                                                                                                                                                                                                                                                                                                                                                                                                                                                                                                                                                                                                                                                                           |
| 49 | Gout                                 | Gout [Gout]                                                                                                | [Arthritis, Gouty], [Gout]                                                                                                                                                                                                                                                                                                                                                                                                                                                                                                                                                                                                                                                                                                                                                                                                                                                                                                                                                                                                                                                                                                                                                |

|    |                                                     |                                                                                                                                                                                                                                                                      |                                                                                                                                                                                                                                                                                                                                                                                                                                                                                                                                                                                                                                                                                                                                                        |
|----|-----------------------------------------------------|----------------------------------------------------------------------------------------------------------------------------------------------------------------------------------------------------------------------------------------------------------------------|--------------------------------------------------------------------------------------------------------------------------------------------------------------------------------------------------------------------------------------------------------------------------------------------------------------------------------------------------------------------------------------------------------------------------------------------------------------------------------------------------------------------------------------------------------------------------------------------------------------------------------------------------------------------------------------------------------------------------------------------------------|
| 50 | Guinea worm disease                                 | Guinea worm disease [Guinea worm disease]                                                                                                                                                                                                                            | [Dracunculiasis], [Dracunculus Nematode]                                                                                                                                                                                                                                                                                                                                                                                                                                                                                                                                                                                                                                                                                                               |
| 51 | Gynecological diseases                              | Uterine fibroids [Uterine fibroids]<br>Polycystic ovarian syndrome [Polycystic ovarian syndrome]<br>Female infertility [Female infertility]<br>Endometriosis [Endometriosis]<br>Genital prolapse [Genital prolapse]<br>Premenstrual syndrome [Premenstrual syndrome] | [Anovulation], [Cystocele], [Embryo Implantation, Delayed], [Endometrial Hyperplasia], [Endometriosis], [Fallopian Tube Patency Tests], [Gonadal Dysgenesis, 46,XX], [Infertility, Female], [Leiomyoma], [Menorrhagia], [Metrorrhagia], [Myoma], [Pelvic Organ Prolapse], [Polycystic Ovary Syndrome], [Premenstrual Syndrome], [Primary Ovarian Insufficiency], [Rectocele], [Uterine Myomectomy], [Uterine Prolapse]                                                                                                                                                                                                                                                                                                                                 |
| 52 | Headache disorders                                  | Migraine [Migraine]<br>Tension-type headache [Tension-type headache]                                                                                                                                                                                                 | [Calcitonin Gene-Related Peptide Receptor Antagonists], [Cortical Spreading Depression], [Migraine Disorders], [Migraine with Aura], [Migraine without Aura], [Ophthalmoplegic Migraine], [Sumatriptan], [Tension-Type Headache]                                                                                                                                                                                                                                                                                                                                                                                                                                                                                                                       |
| 53 | Hemoglobinopathies and hemolytic anemias            | Hemoglobinopathies and hemolytic anemias [Hemoglobinopathies, Hemolytic anemias]                                                                                                                                                                                     | [Acute Chest Syndrome], [Anemia, Aplastic], [Anemia, Dyserythropoietic, Congenital], [Anemia, Hemolytic], [Anemia, Hemolytic, Autoimmune], [Anemia, Hemolytic, Congenital], [Anemia, Hemolytic, Congenital Nonspherocytic], [Anemia, Sickle Cell], [Anemia, Sideroblastic], [Antisickling Agents], [Elliptocytosis, Hereditary], [Favism], [Glucosephosphate Dehydrogenase Deficiency], [Hemoglobin C], [Hemoglobin C Disease], [Hemoglobin E], [Hemoglobin H], [Hemoglobin SC Disease], [Hemoglobin, Sickle], [Hemoglobinopathies], [Hemoglobinuria, Paroxysmal], [Hemolytic-Uremic Syndrome], [Sickle Cell Trait], [Spherocytosis, Hereditary], [Thalassemia], [Vaso-Occlusive Crises], [alpha-Thalassemia], [beta-Thalassemia], [delta-Thalassemia] |
| 54 | HIV/AIDS                                            | HIV/AIDS [HIV, AIDS]                                                                                                                                                                                                                                                 | [Sarcoma, Kaposi], [AIDS Dementia Complex], [AIDS-Associated Nephropathy], [AIDS-Related Complex], [AIDS-Related Opportunistic Infections], [Acquired Immunodeficiency Syndrome], [Acute Retroviral Syndrome], [Antiretroviral Therapy, Highly Active], [Efavirenz, Emtricitabine, Tenofovir Disoproxil Fumarate Drug Combination], [Elvitegravir, Cobicistat, Emtricitabine, Tenofovir Disoproxil Fumarate Drug Combination], [Emtricitabine, Rilpivirine, Tenofovir Drug Combination], [Emtricitabine, Tenofovir Disoproxil Fumarate Drug Combination], [HIV], [HIV Enteropathy], [HIV Infections], [HIV Seropositivity], [HIV Wasting Syndrome], [HIV-1], [HIV-2], [Lopinavir], [Zalcitabine]                                                       |
| 55 | Hodgkin lymphoma                                    | Hodgkin lymphoma [Hodgkin lymphoma]                                                                                                                                                                                                                                  | [Hodgkin Disease], [Reed-Sternberg Cells]                                                                                                                                                                                                                                                                                                                                                                                                                                                                                                                                                                                                                                                                                                              |
| 56 | Idiopathic epilepsy                                 | Idiopathic epilepsy [Idiopathic epilepsy]                                                                                                                                                                                                                            | [Epilepsia Partialis Continua], [Epilepsy, Absence], [Landau-Kleffner Syndrome], [Unverricht-Lundborg Syndrome]                                                                                                                                                                                                                                                                                                                                                                                                                                                                                                                                                                                                                                        |
| 57 | Inflammatory bowel disease                          | Inflammatory bowel disease [Inflammatory bowel disease]                                                                                                                                                                                                              | [Colitis], [Colitis, Collagenous], [Colitis, Microscopic], [Colitis, Ulcerative], [Crohn Disease], [Ileitis], [Inflammatory Bowel Diseases], [Pouchitis], [Proctocolitis]                                                                                                                                                                                                                                                                                                                                                                                                                                                                                                                                                                              |
| 58 | Inguinal, femoral, and abdominal hernia             | Inguinal, femoral, and abdominal hernia [Inguinal hernia, Femoral hernia, Abdominal hernia]                                                                                                                                                                          | [Hernia], [Hernia, Abdominal], [Hernia, Diaphragmatic], [Hernia, Femoral], [Hernia, Inguinal], [Hernia, Obturator], [Hernia, Umbilical], [Hernia, Ventral], [Incisional Hernia]                                                                                                                                                                                                                                                                                                                                                                                                                                                                                                                                                                        |
| 59 | Interstitial lung disease and pulmonary sarcoidosis | Interstitial lung disease and pulmonary sarcoidosis [Interstitial lung disease, Pulmonary sarcoidosis]                                                                                                                                                               | [Alveolitis, Extrinsic Allergic], [Berylliosis], [Bird Fancier's Lung], [Caplan Syndrome], [Cryptogenic Organizing Pneumonia], [Farmer's Lung], [Hamman-Rich Syndrome], [Idiopathic Interstitial Pneumonias], [Idiopathic Pulmonary Fibrosis], [Kveim Test], [Lung Diseases, Interstitial], [Lymphangioleiomyomatosis], [Organizing Pneumonia], [Pulmonary Fibrosis], [Sarcoidosis], [Sarcoidosis, Pulmonary], [Silo Filler's Disease]                                                                                                                                                                                                                                                                                                                 |
| 60 | Intestinal nematode infections                      | Ascariasis [Ascariasis]<br>Trichuriasis [Trichuriasis]<br>Hookworm disease [Hookworm disease]                                                                                                                                                                        | [Ancylostoma], [Ancylostomatoidea], [Ancylostomiasis], [Ascariasis], [Ascariasis], [Ascaridida], [Ascaridida Infections], [Ascaridoidea], [Ascaris], [Ascaris lumbricoides], [Hookworm Infections], [Necator], [Necator americanus], [Necatoriasis], [Nematode Infections], [Pyrantel], [Trichuriasis], [Trichuris]                                                                                                                                                                                                                                                                                                                                                                                                                                    |
| 61 | Iodine deficiency                                   | Iodine deficiency [Iodine deficiency]                                                                                                                                                                                                                                | [Goiter, Endemic]                                                                                                                                                                                                                                                                                                                                                                                                                                                                                                                                                                                                                                                                                                                                      |
| 62 | Ischemic heart disease                              | Ischemic heart disease [Ischemic heart disease]                                                                                                                                                                                                                      | [Acute Coronary Syndrome], [Angina Pectoris], [Angina Pectoris, Variant], [Angina, Stable], [Angina, Unstable], [Anterior Wall Myocardial Infarction], [Coronary Aneurysm], [Coronary Artery Disease], [Coronary Disease], [Coronary Occlusion], [Coronary Thrombosis], [Coronary Vasospasm], [Heart Aneurysm], [Heart Rupture, Post-Infarction], [Inferior Wall Myocardial Infarction], [Myocardial Infarction], [Myocardial Ischemia], [Non-ST Elevated Myocardial Infarction], [ST Elevation Myocardial Infarction]                                                                                                                                                                                                                                 |
| 63 | Kidney cancer                                       | Kidney cancer [Kidney cancer]                                                                                                                                                                                                                                        | [Carcinoma, Renal Cell], [Wilms Tumor]                                                                                                                                                                                                                                                                                                                                                                                                                                                                                                                                                                                                                                                                                                                 |

|    |                                             |                                                                                                                                                                                                                      |                                                                                                                                                                                                                                                                                                                                                                                                                                                                                                                                                                                                                                                                                                                                                                                                                                                                                                                                                                                                                                                                                                                                                                                                                                                                                                                                                                                                                                                                                                                                                                                                                                                                                                                                                                                                                                                                                                                                                                                                                                                                                                                                                                                                                                                                                                                                                                                                                                                                                                                                        |
|----|---------------------------------------------|----------------------------------------------------------------------------------------------------------------------------------------------------------------------------------------------------------------------|----------------------------------------------------------------------------------------------------------------------------------------------------------------------------------------------------------------------------------------------------------------------------------------------------------------------------------------------------------------------------------------------------------------------------------------------------------------------------------------------------------------------------------------------------------------------------------------------------------------------------------------------------------------------------------------------------------------------------------------------------------------------------------------------------------------------------------------------------------------------------------------------------------------------------------------------------------------------------------------------------------------------------------------------------------------------------------------------------------------------------------------------------------------------------------------------------------------------------------------------------------------------------------------------------------------------------------------------------------------------------------------------------------------------------------------------------------------------------------------------------------------------------------------------------------------------------------------------------------------------------------------------------------------------------------------------------------------------------------------------------------------------------------------------------------------------------------------------------------------------------------------------------------------------------------------------------------------------------------------------------------------------------------------------------------------------------------------------------------------------------------------------------------------------------------------------------------------------------------------------------------------------------------------------------------------------------------------------------------------------------------------------------------------------------------------------------------------------------------------------------------------------------------------|
| 64 | Larynx cancer                               | Larynx cancer [Larynx cancer]                                                                                                                                                                                        | [Laryngeal Neoplasms], [Laryngectomy]                                                                                                                                                                                                                                                                                                                                                                                                                                                                                                                                                                                                                                                                                                                                                                                                                                                                                                                                                                                                                                                                                                                                                                                                                                                                                                                                                                                                                                                                                                                                                                                                                                                                                                                                                                                                                                                                                                                                                                                                                                                                                                                                                                                                                                                                                                                                                                                                                                                                                                  |
| 65 | Leishmaniasis                               | Leishmaniasis [Leishmaniasis]                                                                                                                                                                                        | [Antimony Sodium Gluconate], [Leishmania braziliensis], [Leishmania donovani], [Leishmania guyanensis], [Leishmania infantum], [Leishmania major], [Leishmania mexicana], [Leishmania tropica], [Leishmaniasis], [Leishmaniasis, Cutaneous], [Leishmaniasis, Diffuse Cutaneous], [Leishmaniasis, Mucocutaneous], [Leishmaniasis, Visceral], [Meglumine Antimoniate]                                                                                                                                                                                                                                                                                                                                                                                                                                                                                                                                                                                                                                                                                                                                                                                                                                                                                                                                                                                                                                                                                                                                                                                                                                                                                                                                                                                                                                                                                                                                                                                                                                                                                                                                                                                                                                                                                                                                                                                                                                                                                                                                                                    |
| 66 | Leprosy                                     | Leprosy [Leprosy]                                                                                                                                                                                                    | [Acedapsone], [Clofazimine], [Leprostic Agents], [Leprosy], [Leprosy, Borderline], [Leprosy, Lepromatous], [Leprosy, Multibacillary], [Leprosy, Paucibacillary], [Leprosy, Tuberculoid], [Mycobacterium leprae]                                                                                                                                                                                                                                                                                                                                                                                                                                                                                                                                                                                                                                                                                                                                                                                                                                                                                                                                                                                                                                                                                                                                                                                                                                                                                                                                                                                                                                                                                                                                                                                                                                                                                                                                                                                                                                                                                                                                                                                                                                                                                                                                                                                                                                                                                                                        |
| 67 | Leukemia                                    | Acute lymphoid leukemia [Acute lymphoid leukemia]<br>Chronic lymphoid leukemia [Chronic lymphoid leukemia]<br>Acute myeloid leukemia [Acute myeloid leukemia]<br>Chronic myeloid leukemia [Chronic myeloid leukemia] | [Anemia, Refractory, with Excess of Blasts], [Blast Crisis], [Fusion Proteins, bcr-abl], [Imatinib Mesylate], [Leukemia, Erythroblastic, Acute], [Leukemia, Lymphocytic, Chronic, B-Cell], [Leukemia, Megakaryoblastic, Acute], [Leukemia, Monocytic, Acute], [Leukemia, Myelogenous, Chronic, BCR-ABL Positive], [Leukemia, Myeloid, Acute], [Leukemia, Myeloid, Chronic, Atypical, BCR-ABL Negative], [Leukemia, Myeloid, Chronic-Phase], [Leukemia, Myelomonocytic, Acute], [Leukemia, Prolymphocytic], [Leukemia, Prolymphocytic, B-Cell], [Leukemia, Prolymphocytic, T-Cell], [Leukemia, Promyelocytic, Acute], [Philadelphia Chromosome], [Precursor B-Cell Lymphoblastic Leukemia-Lymphoma], [Precursor Cell Lymphoblastic Leukemia-Lymphoma], [Precursor T-Cell Lymphoblastic Leukemia-Lymphoma], [Sarcoma, Myeloid], [Leukemia]                                                                                                                                                                                                                                                                                                                                                                                                                                                                                                                                                                                                                                                                                                                                                                                                                                                                                                                                                                                                                                                                                                                                                                                                                                                                                                                                                                                                                                                                                                                                                                                                                                                                                               |
| 68 | Lip and oral cavity cancer                  | Lip and oral cavity cancer [Lip cancer, Oral cavity cancer]                                                                                                                                                          | [Carcinoma, Verrucous], [Gingival Neoplasms], [Lip Neoplasms], [Palatal Neoplasms], [Squamous Cell Carcinoma of Head and Neck], [Sublingual Gland Neoplasms]                                                                                                                                                                                                                                                                                                                                                                                                                                                                                                                                                                                                                                                                                                                                                                                                                                                                                                                                                                                                                                                                                                                                                                                                                                                                                                                                                                                                                                                                                                                                                                                                                                                                                                                                                                                                                                                                                                                                                                                                                                                                                                                                                                                                                                                                                                                                                                           |
| 69 | Liver cancer                                | Liver cancer [Liver cancer]                                                                                                                                                                                          | [Aflatoxin B1], [Aflatoxins], [Carcinoma, Hepatocellular], [Hepatoblastoma], [Liver Neoplasms]                                                                                                                                                                                                                                                                                                                                                                                                                                                                                                                                                                                                                                                                                                                                                                                                                                                                                                                                                                                                                                                                                                                                                                                                                                                                                                                                                                                                                                                                                                                                                                                                                                                                                                                                                                                                                                                                                                                                                                                                                                                                                                                                                                                                                                                                                                                                                                                                                                         |
| 70 | Low back pain                               | Low back pain [Low back pain]                                                                                                                                                                                        | [Hyperostosis, Diffuse Idiopathic Skeletal], [Intervertebral Disc Degeneration], [Intervertebral Disc Displacement], [Low Back Pain], [Radiculopathy], [Sciatica], [Spinal Osteochondrosis], [Spinal Stenosis], [Spondylolisthesis], [Spondylolysis], [Back Pain]                                                                                                                                                                                                                                                                                                                                                                                                                                                                                                                                                                                                                                                                                                                                                                                                                                                                                                                                                                                                                                                                                                                                                                                                                                                                                                                                                                                                                                                                                                                                                                                                                                                                                                                                                                                                                                                                                                                                                                                                                                                                                                                                                                                                                                                                      |
| 71 | Lower extremity peripheral arterial disease | Lower extremity peripheral arterial disease [Lower extremity peripheral arterial disease]                                                                                                                            | [Arteriosclerosis Obliterans], [Blue Toe Syndrome], [Chronic Limb-Threatening Ischemia], [Intermittent Claudication], [Leriche Syndrome], [Monckeberg Medial Calcific Sclerosis], [Peripheral Arterial Disease], [Peripheral Vascular Diseases], [Raynaud Disease], [Thromboangiitis Obliterans]                                                                                                                                                                                                                                                                                                                                                                                                                                                                                                                                                                                                                                                                                                                                                                                                                                                                                                                                                                                                                                                                                                                                                                                                                                                                                                                                                                                                                                                                                                                                                                                                                                                                                                                                                                                                                                                                                                                                                                                                                                                                                                                                                                                                                                       |
| 72 | Lower respiratory infections & Covid19      | Lower respiratory infections [Lower respiratory infection]<br>COVID-19 [Covid-19, Covid19]                                                                                                                           | [Alphainfluenzavirus], [Betacoronavirus 1], [Betainfluenzavirus], [Bronchiolitis], [Bronchiolitis, Viral], [Bronchitis], [Bronchopneumonia], [Chlamydial Pneumonia], [Chlamydia Infections], [Chlamydia pneumoniae], [Community-Acquired Pneumonia], [Coronavirus Infections], [Coronavirus NL63, Human], [Empyema], [Empyema, Pleural], [Haemophilus influenzae], [Haemophilus influenzae type b], [Hemagglutinin Glycoproteins, Influenza Virus], [Human bocavirus], [Influenza A Virus, H10N7 Subtype], [Influenza A Virus, H10N8 Subtype], [Influenza A Virus, H1N1 Subtype], [Influenza A Virus, H1N2 Subtype], [Influenza A Virus, H2N2 Subtype], [Influenza A Virus, H3N2 Subtype], [Influenza A Virus, H5N1 Subtype], [Influenza A Virus, H5N2 Subtype], [Influenza A Virus, H5N6 Subtype], [Influenza A Virus, H5N8 Subtype], [Influenza A Virus, H7N1 Subtype], [Influenza A Virus, H7N2 Subtype], [Influenza A Virus, H7N3 Subtype], [Influenza A Virus, H7N7 Subtype], [Influenza A Virus, H7N9 Subtype], [Influenza A Virus, H9N2 Subtype], [Influenza A virus], [Influenza B virus], [Influenza, Human], [Klebsiella pneumoniae], [Legionella], [Legionella longbeachae], [Legionella pneumophila], [Legionellosis], [Legionnaires' Disease], [Lung Abscess], [Metapneumovirus], [Middle East Respiratory Syndrome Coronavirus], [Moraxella catarrhalis], [Mycoplasma Infections], [Mycoplasma pneumoniae], [Orthomyxoviridae], [Orthomyxoviridae Infections], [Parainfluenza Virus 1, Human], [Parainfluenza Virus 2, Human], [Parainfluenza Virus 3, Human], [Parainfluenza Virus 4, Human], [Paramyxoviridae Infections], [Pasteurellosis, Pneumonic], [Pleural Effusion], [Pleuropneumonia], [Pneumococcal Infections], [Pneumocystis Infections], [Pneumocystis carinii], [Pneumonia], [Pneumonia, Bacterial], [Pneumonia, Mycoplasma], [Pneumonia, Necrotizing], [Pneumonia, Pneumococcal], [Pneumonia, Pneumocystis], [Pneumonia, Staphylococcal], [Pneumonia, Viral], [Pneumovirinae], [Pneumovirus], [Pneumovirus Infections], [Psittacosis], [Respiratory Syncytial Virus Infections], [Respiratory Syncytial Virus, Human], [Respiratory Syncytial Viruses], [Respirovirus], [Respirovirus Infections], [Severe Acute Respiratory Syndrome], [Severe acute respiratory syndrome-related coronavirus], [Streptococcus pneumoniae], [COVID-19], [COVID-19 Drug Treatment], [COVID-19 Nucleic Acid Testing], [COVID-19 Testing], [Post-Acute COVID-19 Syndrome], [SARS-CoV-2], [Spike Glycoprotein, Coronavirus] |
| 73 | Lymphatic filariasis                        | Lymphatic filariasis [Lymphatic filariasis]                                                                                                                                                                          | [Brugia], [Brugia malayi], [Elephantiasis, Filarial], [Filariasis], [Wuchereria], [Wuchereria bancrofti]                                                                                                                                                                                                                                                                                                                                                                                                                                                                                                                                                                                                                                                                                                                                                                                                                                                                                                                                                                                                                                                                                                                                                                                                                                                                                                                                                                                                                                                                                                                                                                                                                                                                                                                                                                                                                                                                                                                                                                                                                                                                                                                                                                                                                                                                                                                                                                                                                               |
| 74 | Malaria                                     | Malaria [Malaria]                                                                                                                                                                                                    | [Amodiaquine], [Artemether], [Artemether, Lumefantrine Drug Combination], [Artesunate], [Blackwater Fever], [Haemosporida], [Insecticide-Treated Bednets], [Lumefantrine], [Malaria], [Malaria, Cerebral], [Malaria, Falciparum],                                                                                                                                                                                                                                                                                                                                                                                                                                                                                                                                                                                                                                                                                                                                                                                                                                                                                                                                                                                                                                                                                                                                                                                                                                                                                                                                                                                                                                                                                                                                                                                                                                                                                                                                                                                                                                                                                                                                                                                                                                                                                                                                                                                                                                                                                                      |

|    |                                                        |                                                                                                                                                                                                                                                                                                                                                                                                                                                                                                                                                                                                          |                                                                                                                                                                                                                                                                                                                                                                                                                                                                                                                                                                                                                                                                                                                                                                                                                                                                                                                                                                                                                                                                                                                                                                                                                                                                                                                                                                |
|----|--------------------------------------------------------|----------------------------------------------------------------------------------------------------------------------------------------------------------------------------------------------------------------------------------------------------------------------------------------------------------------------------------------------------------------------------------------------------------------------------------------------------------------------------------------------------------------------------------------------------------------------------------------------------------|----------------------------------------------------------------------------------------------------------------------------------------------------------------------------------------------------------------------------------------------------------------------------------------------------------------------------------------------------------------------------------------------------------------------------------------------------------------------------------------------------------------------------------------------------------------------------------------------------------------------------------------------------------------------------------------------------------------------------------------------------------------------------------------------------------------------------------------------------------------------------------------------------------------------------------------------------------------------------------------------------------------------------------------------------------------------------------------------------------------------------------------------------------------------------------------------------------------------------------------------------------------------------------------------------------------------------------------------------------------|
|    |                                                        |                                                                                                                                                                                                                                                                                                                                                                                                                                                                                                                                                                                                          | [Malaria, Vivax], [Merozoites], [Plasmodium], [Plasmodium falciparum], [Plasmodium knowlesi], [Plasmodium malariae], [Plasmodium ovale], [Plasmodium vivax], [Primaquine], [Schizonts]                                                                                                                                                                                                                                                                                                                                                                                                                                                                                                                                                                                                                                                                                                                                                                                                                                                                                                                                                                                                                                                                                                                                                                         |
| 75 | Malignant neoplasm of bone and articular cartilage     | Malignant neoplasm of bone and articular cartilage [Malignant neoplasm of bone, Malignant neoplasm of articular cartilage]                                                                                                                                                                                                                                                                                                                                                                                                                                                                               | [Chondrosarcoma], [Chondrosarcoma, Clear Cell], [Chondrosarcoma, Mesenchymal], [Chordoma], [Neoplasms, Bone Tissue], [Osteosarcoma], [Osteosarcoma, Juxtacortical], [Sarcoma, Ewing]                                                                                                                                                                                                                                                                                                                                                                                                                                                                                                                                                                                                                                                                                                                                                                                                                                                                                                                                                                                                                                                                                                                                                                           |
| 76 | Malignant skin melanoma                                | Malignant skin melanoma [Malignant skin melanoma]                                                                                                                                                                                                                                                                                                                                                                                                                                                                                                                                                        | [Hutchinson's Melanotic Freckle], [MART-1 Antigen], [Melanoma], [Melanoma, Amelanotic], [Melanoma, Cutaneous Malignant], [Nevus, Pigmented]                                                                                                                                                                                                                                                                                                                                                                                                                                                                                                                                                                                                                                                                                                                                                                                                                                                                                                                                                                                                                                                                                                                                                                                                                    |
| 77 | Maternal disorders                                     | Maternal hemorrhage [Maternal hemorrhage]<br>Maternal sepsis and other maternal infections [Maternal sepsis, Maternal infection]<br>Maternal hypertensive disorders [Maternal hypertensive disorder]<br>Maternal obstructed labor and uterine rupture [Maternal obstructed labor, Uterine rupture]<br>Maternal abortion and miscarriage [Maternal abortion, Miscarriage]<br>Ectopic pregnancy [Ectopic pregnancy]<br>Indirect maternal deaths [Indirect maternal death]<br>Late maternal deaths [Late maternal death]<br>Maternal deaths aggravated by HIV/AIDS [Maternal deaths aggravated by HIV/AIDS] | [Chorioamnionitis], [Abortion, Habitual], [Abortion, Incomplete], [Abortion, Induced], [Abortion, Missed], [Abortion, Septic], [Abortion, Spontaneous], [Abortion, Therapeutic], [Abortion, Threatened], [Abruptio Placentae], [Breech Presentation], [Cephalopelvic Disproportion], [Chorea Gravidarum], [Diabetes, Gestational], [Dystocia], [Eclampsia], [Embolism, Amniotic Fluid], [Embryo Loss], [Extraction, Obstetrical], [Gestational Trophoblastic Disease], [HELLP Syndrome], [Hydatidiform Mole], [Hyperemesis Gravidarum], [Hypertension, Pregnancy-Induced], [Maternal Death], [Obstetric Labor Complications], [Peripartum Cardiomyopathy], [Placenta Accreta], [Placenta Previa], [Placenta, Retained], [Postpartum Hemorrhage], [Pre-Eclampsia], [Pregnancy Complications, Cardiovascular], [Pregnancy Complications, Infectious], [Pregnancy Complications, Neoplastic], [Pregnancy Complications, Parasitic], [Pregnancy in Diabetics], [Pregnancy, Abdominal], [Pregnancy, Cornual], [Pregnancy, Ectopic], [Pregnancy, Interstitial], [Pregnancy, Ovarian], [Pregnancy, Tubal], [Puerperal Infection], [Rectovaginal Fistula], [Shoulder Dystocia], [Symphysiotomy], [Uterine Balloon Tamponade], [Uterine Inertia], [Uterine Inversion], [Uterine Rupture], [Vacuum Curettage], [Vaginal Fistula], [Vasa Previa], [Vesicovaginal Fistula] |
| 78 | Measles                                                | Measles [Measles]                                                                                                                                                                                                                                                                                                                                                                                                                                                                                                                                                                                        | [Measles], [Measles virus]                                                                                                                                                                                                                                                                                                                                                                                                                                                                                                                                                                                                                                                                                                                                                                                                                                                                                                                                                                                                                                                                                                                                                                                                                                                                                                                                     |
| 79 | Meningitis                                             | Meningitis [Meningitis]                                                                                                                                                                                                                                                                                                                                                                                                                                                                                                                                                                                  | [Angiostrongylus cantonensis], [Arachnoiditis], [Coccidioidal Meningitis], [Lymphocytic Choriomeningitis], [Lymphocytic choriomeningitis virus], [Meningitis], [Meningitis, Aseptic], [Meningitis, Bacterial], [Meningitis, Cryptococcal], [Meningitis, Escherichia coli], [Meningitis, Fungal], [Meningitis, Haemophilus], [Meningitis, Listeria], [Meningitis, Meningococcal], [Meningitis, Pneumococcal], [Meningitis, Viral], [Meningococcal Infections], [Neisseria meningitidis], [Neisseria meningitidis, Serogroup A], [Neisseria meningitidis, Serogroup B], [Neisseria meningitidis, Serogroup C], [Neisseria meningitidis, Serogroup W-135], [Neisseria meningitidis, Serogroup Y]                                                                                                                                                                                                                                                                                                                                                                                                                                                                                                                                                                                                                                                                  |
| 80 | Mesothelioma                                           | Mesothelioma [Mesothelioma]                                                                                                                                                                                                                                                                                                                                                                                                                                                                                                                                                                              | [Mesothelioma], [Mesothelioma, Malignant], [Neoplasms, Mesothelial]                                                                                                                                                                                                                                                                                                                                                                                                                                                                                                                                                                                                                                                                                                                                                                                                                                                                                                                                                                                                                                                                                                                                                                                                                                                                                            |
| 81 | Motor neuron disease                                   | Motor neuron disease [Motor neuron disease]                                                                                                                                                                                                                                                                                                                                                                                                                                                                                                                                                              | [Amyotrophic Lateral Sclerosis], [Bulbar Palsy, Progressive], [Bulbo-Spinal Atrophy, X-Linked], [Motor Neuron Disease], [Muscular Atrophy, Spinal], [Spinal Muscular Atrophies of Childhood]                                                                                                                                                                                                                                                                                                                                                                                                                                                                                                                                                                                                                                                                                                                                                                                                                                                                                                                                                                                                                                                                                                                                                                   |
| 82 | Multiple myeloma                                       | Multiple myeloma [Multiple myeloma]                                                                                                                                                                                                                                                                                                                                                                                                                                                                                                                                                                      | [Heavy Chain Disease], [Immunoproliferative Disorders], [Immunoproliferative Small Intestinal Disease], [Leukemia, Plasma Cell], [Lymphoma, B-Cell, Marginal Zone], [Multiple Myeloma], [Neoplasms, Plasma Cell], [Plasmacytoma], [Smoldering Multiple Myeloma], [Waldenstrom Macroglobulinemia]                                                                                                                                                                                                                                                                                                                                                                                                                                                                                                                                                                                                                                                                                                                                                                                                                                                                                                                                                                                                                                                               |
| 83 | Multiple sclerosis                                     | Multiple sclerosis [Multiple sclerosis]                                                                                                                                                                                                                                                                                                                                                                                                                                                                                                                                                                  | [Glatiramer Acetate], [Multiple Sclerosis], [Multiple Sclerosis, Chronic Progressive], [Multiple Sclerosis, Relapsing-Remitting]                                                                                                                                                                                                                                                                                                                                                                                                                                                                                                                                                                                                                                                                                                                                                                                                                                                                                                                                                                                                                                                                                                                                                                                                                               |
| 84 | Nasopharynx cancer                                     | Nasopharynx cancer [Nasopharynx cancer]                                                                                                                                                                                                                                                                                                                                                                                                                                                                                                                                                                  | [Nasopharyngeal Carcinoma], [Nasopharyngeal Neoplasms]                                                                                                                                                                                                                                                                                                                                                                                                                                                                                                                                                                                                                                                                                                                                                                                                                                                                                                                                                                                                                                                                                                                                                                                                                                                                                                         |
| 85 | Neck pain                                              | Neck pain [Neck pain]                                                                                                                                                                                                                                                                                                                                                                                                                                                                                                                                                                                    | [Neck Pain], [Posterior Cervical Sympathetic Syndrome]                                                                                                                                                                                                                                                                                                                                                                                                                                                                                                                                                                                                                                                                                                                                                                                                                                                                                                                                                                                                                                                                                                                                                                                                                                                                                                         |
| 86 | Neuroblastoma and other peripheral nervous cell tumors | Neuroblastoma and other peripheral nervous cell tumors [Neuroblastoma, Peripheral nervous cell tumor]                                                                                                                                                                                                                                                                                                                                                                                                                                                                                                    | [Ganglioneuroblastoma], [Neuroblastoma], [Neuroectodermal Tumors, Primitive, Peripheral]                                                                                                                                                                                                                                                                                                                                                                                                                                                                                                                                                                                                                                                                                                                                                                                                                                                                                                                                                                                                                                                                                                                                                                                                                                                                       |
| 87 | Non-Hodgkin lymphoma                                   | Burkitt lymphoma [Burkitt lymphoma]                                                                                                                                                                                                                                                                                                                                                                                                                                                                                                                                                                      | [Burkitt Lymphoma], [Lymphoma, Primary Effusion], [Lymphomatoid Granulomatosis]                                                                                                                                                                                                                                                                                                                                                                                                                                                                                                                                                                                                                                                                                                                                                                                                                                                                                                                                                                                                                                                                                                                                                                                                                                                                                |

|     |                                            |                                                                                                                                                                                                            |                                                                                                                                                                                                                                                                                                                                                                                                                                                                                                                                                                                                                                                                                                                                                                                                                                                                                                                                                                                                                                                                                                                   |
|-----|--------------------------------------------|------------------------------------------------------------------------------------------------------------------------------------------------------------------------------------------------------------|-------------------------------------------------------------------------------------------------------------------------------------------------------------------------------------------------------------------------------------------------------------------------------------------------------------------------------------------------------------------------------------------------------------------------------------------------------------------------------------------------------------------------------------------------------------------------------------------------------------------------------------------------------------------------------------------------------------------------------------------------------------------------------------------------------------------------------------------------------------------------------------------------------------------------------------------------------------------------------------------------------------------------------------------------------------------------------------------------------------------|
| 88  | Non-melanoma skin cancer                   | Non-melanoma skin cancer (squamous-cell carcinoma) [Non-melanoma skin cancer, Squamous-cell carcinoma]<br>Non-melanoma skin cancer (basal-cell carcinoma) [Non-melanoma skin cancer, Basal-cell carcinoma] | [Bowen's Disease], [Carcinoma, Basal Cell], [Carcinoma, Squamous Cell], [Keratosis, Actinic], [Neoplasms, Basal Cell]                                                                                                                                                                                                                                                                                                                                                                                                                                                                                                                                                                                                                                                                                                                                                                                                                                                                                                                                                                                             |
| 89  | Non-rheumatic valvular heart disease       | Non-rheumatic calcific aortic valve disease [Non-rheumatic calcific aortic valve disease]<br>Non-rheumatic degenerative mitral valve disease [Non-rheumatic degenerative mitral valve disease]             | [Aortic Valve Disease], [Aortic Valve Insufficiency], [Aortic Valve Stenosis], [Mitral Valve Insufficiency], [Mitral Valve Prolapse], [Transcatheter Aortic Valve Replacement]                                                                                                                                                                                                                                                                                                                                                                                                                                                                                                                                                                                                                                                                                                                                                                                                                                                                                                                                    |
| 90  | Onchocerciasis                             | Onchocerciasis [Onchocerciasis]                                                                                                                                                                            | [Onchocerca volvulus], [Onchocerciasis], [Onchocerciasis, Ocular]                                                                                                                                                                                                                                                                                                                                                                                                                                                                                                                                                                                                                                                                                                                                                                                                                                                                                                                                                                                                                                                 |
| 91  | Oral disorders                             | Caries of deciduous teeth [Caries of deciduous teeth]<br>Caries of permanent teeth [Caries of permanent teeth]<br>Periodontal diseases [Periodontal diseases]<br>Edentulism [Edentulism]                   | [Aggregatibacter actinomycetemcomitans], [Aggressive Periodontitis], [Alveolar Bone Loss], [Cariogenic Agents], [Chronic Periodontitis], [DMF Index], [Dental Calculus], [Dental Plaque], [Dental Scaling], [Diet, Cariogenic], [Fibromatosis, Gingival], [Furcation Defects], [Gingival Diseases], [Gingival Hemorrhage], [Gingival Hyperplasia], [Gingival Hypertrophy], [Gingival Overgrowth], [Gingival Pocket], [Gingival Recession], [Gingivitis], [Gingivitis, Necrotizing Ulcerative], [Jaw, Edentulous], [Jaw, Edentulous, Partially], [Mouth, Edentulous], [Papillon-Lefevre Disease], [Peri-Implantitis], [Periapical Abscess], [Periodontal Abscess], [Periodontal Atrophy], [Periodontal Attachment Loss], [Periodontal Debridement], [Periodontal Diseases], [Periodontal Pocket], [Periodontitis], [Porphyromonas gingivalis], [Prevotella intermedia], [Pulpitis], [Pulpotomy], [Root Caries], [Root Planing], [Streptococcus mutans], [Streptococcus sobrinus], [Subgingival Curettage], [Tannerella forsythia], [Tooth Demineralization], [Tooth Loss], [Tooth Mobility], [Treponema denticola] |
| 92  | Osteoarthritis                             | Osteoarthritis [Osteoarthritis]                                                                                                                                                                            | [Hallux Rigidus], [Osteoarthritis], [Osteoarthritis, Hip], [Osteoarthritis, Knee], [Spinal Osteophytosis]                                                                                                                                                                                                                                                                                                                                                                                                                                                                                                                                                                                                                                                                                                                                                                                                                                                                                                                                                                                                         |
| 93  | Otitis media                               | Otitis media [Otitis media]                                                                                                                                                                                | [Cholesteatoma, Middle Ear], [Cholesteatoma], [Mastoiditis], [Otitis Media], [Otitis Media with Effusion], [Otitis Media, Suppurative], [Petrositis], [Tympanocentesis]                                                                                                                                                                                                                                                                                                                                                                                                                                                                                                                                                                                                                                                                                                                                                                                                                                                                                                                                           |
| 94  | Ovarian cancer                             | Ovarian cancer [Ovarian cancer]                                                                                                                                                                            | [Brenner Tumor], [Carcinoma, Ovarian Epithelial], [Cystadenocarcinoma, Serous], [Dysgerminoma], [Granulosa Cell Tumor], [Ovarian Neoplasms], [Sertoli-Leydig Cell Tumor]                                                                                                                                                                                                                                                                                                                                                                                                                                                                                                                                                                                                                                                                                                                                                                                                                                                                                                                                          |
| 95  | Pancreatic cancer                          | Pancreatic cancer [Pancreatic cancer]                                                                                                                                                                      | [Carcinoma, Islet Cell], [Carcinoma, Pancreatic Ductal], [Pancreatic Intraductal Neoplasms], [Pancreatic Neoplasms]                                                                                                                                                                                                                                                                                                                                                                                                                                                                                                                                                                                                                                                                                                                                                                                                                                                                                                                                                                                               |
| 96  | Pancreatitis                               | Pancreatitis [Pancreatitis]                                                                                                                                                                                | [Autoimmune Pancreatitis], [Pancreatic Cyst], [Pancreatic Diseases], [Pancreatic Pseudocyst], [Pancreatitis], [Pancreatitis, Acute Hemorrhagic], [Pancreatitis, Acute Necrotizing], [Pancreatitis, Chronic]                                                                                                                                                                                                                                                                                                                                                                                                                                                                                                                                                                                                                                                                                                                                                                                                                                                                                                       |
| 97  | Paralytic ileus and intestinal obstruction | Paralytic ileus and intestinal obstruction [Paralytic ileus, Intestinal obstruction]                                                                                                                       | [Afferent Loop Syndrome], [Colonic Pseudo-Obstruction], [Duodenal Obstruction], [Fecal Impaction], [Ileus], [Intestinal Obstruction], [Intestinal Pseudo-Obstruction], [Intestinal Volvulus], [Intussusception], [Meconium Ileus], [Megacolon], [Superior Mesenteric Artery Syndrome]                                                                                                                                                                                                                                                                                                                                                                                                                                                                                                                                                                                                                                                                                                                                                                                                                             |
| 98  | Parkinson's disease                        | Parkinson's disease [Parkinson]                                                                                                                                                                            | [Parkinson Disease]                                                                                                                                                                                                                                                                                                                                                                                                                                                                                                                                                                                                                                                                                                                                                                                                                                                                                                                                                                                                                                                                                               |
| 99  | Pertussis                                  | Pertussis [Pertussis]                                                                                                                                                                                      | [Bordetella pertussis], [Whooping Cough]                                                                                                                                                                                                                                                                                                                                                                                                                                                                                                                                                                                                                                                                                                                                                                                                                                                                                                                                                                                                                                                                          |
| 100 | Pneumoconiosis                             | Silicosis [Silicosis]<br>Asbestosis [Asbestosis]<br>Coal workers pneumoconiosis [Coal workers pneumoconiosis]                                                                                              | [Anthracosilicosis], [Anthracosis], [Asbestos], [Asbestos], [Silicosis], [Pneumoconiosis]                                                                                                                                                                                                                                                                                                                                                                                                                                                                                                                                                                                                                                                                                                                                                                                                                                                                                                                                                                                                                         |
| 101 | Prostate cancer                            | Prostate cancer [Prostate cancer]                                                                                                                                                                          | [Abiraterone Acetate], [Flutamide], [Prostatic Neoplasms], [Prostatic Neoplasms, Castration-Resistant]                                                                                                                                                                                                                                                                                                                                                                                                                                                                                                                                                                                                                                                                                                                                                                                                                                                                                                                                                                                                            |
| 102 | Protein-energy malnutrition                | Protein-energy malnutrition [Protein-energy malnutrition]                                                                                                                                                  | [Kwashiorkor], [Malnutrition], [Protein-Energy Malnutrition]                                                                                                                                                                                                                                                                                                                                                                                                                                                                                                                                                                                                                                                                                                                                                                                                                                                                                                                                                                                                                                                      |
| 103 | Pruritus                                   | Pruritus [Pruritus]                                                                                                                                                                                        | [Pruritus]                                                                                                                                                                                                                                                                                                                                                                                                                                                                                                                                                                                                                                                                                                                                                                                                                                                                                                                                                                                                                                                                                                        |
| 104 | Psoriasis                                  | Psoriasis [Psoriasis]                                                                                                                                                                                      | [Arthritis, Psoriatic], [Guttate Psoriasis], [Parapsoriasis], [Psoriasis]                                                                                                                                                                                                                                                                                                                                                                                                                                                                                                                                                                                                                                                                                                                                                                                                                                                                                                                                                                                                                                         |
| 105 | Pulmonary Arterial Hypertension            | Pulmonary Arterial Hypertension [Pulmonary arterial hypertension]                                                                                                                                          | [Bosentan], [Familial Primary Pulmonary Hypertension], [Pulmonary Arterial Hypertension], [Pulmonary Venous Occlusive Disease]                                                                                                                                                                                                                                                                                                                                                                                                                                                                                                                                                                                                                                                                                                                                                                                                                                                                                                                                                                                    |
| 106 | Rabies                                     | Rabies [Rabies]                                                                                                                                                                                            | [Rabies], [Rabies virus]                                                                                                                                                                                                                                                                                                                                                                                                                                                                                                                                                                                                                                                                                                                                                                                                                                                                                                                                                                                                                                                                                          |

|     |                                               |                                                                                                                                                                                         |                                                                                                                                                                                                                                                                                                                                                                                                                                                                                                                                                                                                                                                                                                                                                                                                                                                                                                                                                                                                          |
|-----|-----------------------------------------------|-----------------------------------------------------------------------------------------------------------------------------------------------------------------------------------------|----------------------------------------------------------------------------------------------------------------------------------------------------------------------------------------------------------------------------------------------------------------------------------------------------------------------------------------------------------------------------------------------------------------------------------------------------------------------------------------------------------------------------------------------------------------------------------------------------------------------------------------------------------------------------------------------------------------------------------------------------------------------------------------------------------------------------------------------------------------------------------------------------------------------------------------------------------------------------------------------------------|
| 107 | Rheumatic heart disease                       | Rheumatic heart disease [Rheumatic heart disease]                                                                                                                                       | [Rheumatic Fever], [Rheumatic Heart Disease], [Tricuspid Valve Stenosis]                                                                                                                                                                                                                                                                                                                                                                                                                                                                                                                                                                                                                                                                                                                                                                                                                                                                                                                                 |
| 108 | Rheumatoid arthritis                          | Rheumatoid arthritis [Rheumatoid arthritis]                                                                                                                                             | [Arthritis, Juvenile], [Arthritis, Rheumatoid], [Felty Syndrome], [Rheumatoid Nodule], [Rheumatoid Vasculitis], [Still's Disease, Adult-Onset]                                                                                                                                                                                                                                                                                                                                                                                                                                                                                                                                                                                                                                                                                                                                                                                                                                                           |
| 109 | Scabies                                       | Scabies [Scabies]                                                                                                                                                                       | [Sarcoptes scabiei], [Scabies]                                                                                                                                                                                                                                                                                                                                                                                                                                                                                                                                                                                                                                                                                                                                                                                                                                                                                                                                                                           |
| 110 | Schistosomiasis                               | Schistosomiasis [Schistosomiasis]                                                                                                                                                       | [Biomphalaria], [Bulinus], [Cercaria], [Neuroschistosomiasis], [Niridazole], [Oxamniquine], [Praziquantel], [Schistosoma], [Schistosoma haematobium], [Schistosoma japonicum], [Schistosoma mansoni], [Schistosomatidae], [Schistosomiasis], [Schistosomiasis haematobia], [Schistosomiasis japonica], [Schistosomiasis mansoni]                                                                                                                                                                                                                                                                                                                                                                                                                                                                                                                                                                                                                                                                         |
| 111 | Schizophrenia                                 | Schizophrenia [Schizophrenia]                                                                                                                                                           | [Paranoid Disorders], [Schizophrenia], [Schizophrenia Spectrum and Other Psychotic Disorders], [Schizophrenia, Catatonic], [Schizophrenia, Disorganized], [Schizophrenia, Paranoid], [Schizotypal Personality Disorder], [Shared Paranoid Disorder]                                                                                                                                                                                                                                                                                                                                                                                                                                                                                                                                                                                                                                                                                                                                                      |
| 112 | Sexually transmitted infections excluding HIV | Syphilis [Syphilis]<br>Chlamydial infection [Chlamydial infection]<br>Gonococcal infection [Gonococcal infection]<br>Trichomoniasis [Trichomoniasis]<br>Genital herpes [Genital herpes] | [Chancere], [Chlamydia], [Gonorrhoea], [Herpes Genitalis], [Herpesvirus 2, Human], [Lymphogranuloma Venereum], [Neisseria gonorrhoeae], [Neurosyphilis], [Syphilis], [Syphilis, Cardiovascular], [Syphilis, Congenital], [Syphilis, Cutaneous], [Syphilis, Latent], [Tabes Dorsalis], [Treponema pallidum], [Trichomonas], [Trichomonas Infections], [Trichomonas Vaginitis], [Trichomonas vaginalis]                                                                                                                                                                                                                                                                                                                                                                                                                                                                                                                                                                                                    |
| 113 | Soft tissue and other extrasosseous sarcomas  | Soft tissue and other extrasosseous sarcomas [Soft tissue sarcoma, Extrasosseous sarcoma]                                                                                               | [Histiocytic Sarcoma], [Adenosarcoma], [Dendritic Cell Sarcoma, Follicular], [Dendritic Cell Sarcoma, Interdigitating], [Dermatofibrosarcoma], [Desmoplastic Small Round Cell Tumor], [Fibrosarcoma], [Gastrointestinal Stromal Tumors], [Hemangiopericytoma, Epithelioid], [Hemangiopericytoma], [Hemangiosarcoma], [Histiocytoma, Malignant Fibrous], [Langerhans Cell Sarcoma], [Leiomyosarcoma], [Liposarcoma], [Liposarcoma, Myxoid], [Lymphangiosarcoma], [Mast-Cell Sarcoma], [Mesenchymoma], [Myosarcoma], [Myxosarcoma], [Neoplasms, Adipose Tissue], [Neoplasms, Connective Tissue], [Neoplasms, Connective and Soft Tissue], [Neoplasms, Fibrous Tissue], [Neoplasms, Muscle Tissue], [Nerve Sheath Neoplasms], [Neurofibrosarcoma], [Perivascular Epithelioid Cell Neoplasms], [Rhabdoid Tumor], [Rhabdomyosarcoma], [Rhabdomyosarcoma, Alveolar], [Rhabdomyosarcoma, Embryonal], [Sarcoma, Alveolar Soft Part], [Sarcoma, Clear Cell], [Sarcoma, Small Cell], [Sarcoma, Synovial]           |
| 114 | Stomach cancer                                | Stomach cancer [Stomach cancer]                                                                                                                                                         | [Linitis Plastica], [Stomach Neoplasms]                                                                                                                                                                                                                                                                                                                                                                                                                                                                                                                                                                                                                                                                                                                                                                                                                                                                                                                                                                  |
| 115 | Stroke                                        | Ischemic stroke [Ischemic stroke]<br>Intracerebral hemorrhage [Intracerebral hemorrhage]<br>Subarachnoid hemorrhage<br>[Subarachnoid hemorrhage]                                        | [Amaurosis Fugax], [Amnesia, Transient Global], [Aneurysm, Ruptured], [Basal Ganglia Hemorrhage], [Brain Infarction], [Brain Stem Infarctions], [Carotid Artery Thrombosis], [Carotid Artery, Internal, Dissection], [Cerebral Amyloid Angiopathy], [Cerebral Amyloid Angiopathy, Familial], [Cerebral Hemorrhage], [Cerebral Infarction], [Embolic Stroke], [Hemorrhagic Stroke], [Hypertensive Encephalopathy], [Infarction, Anterior Cerebral Artery], [Infarction, Middle Cerebral Artery], [Infarction, Posterior Cerebral Artery], [Intracranial Aneurysm], [Intracranial Embolism], [Intracranial Embolism and Thrombosis], [Intracranial Hemorrhage, Hypertensive], [Intracranial Thrombosis], [Ischemic Attack, Transient], [Ischemic Stroke], [Lateral Medullary Syndrome], [Moyamoya Disease], [Putaminal Hemorrhage], [Stroke], [Stroke, Lacunar], [Subarachnoid Hemorrhage], [Thrombotic Stroke], [Vasospasm, Intracranial], [Vertebral Artery Dissection], [Vertebrobasilar Insufficiency] |
| 116 | Sudden infant death syndrome                  | Sudden infant death syndrome [Sudden infant death syndrome]                                                                                                                             | [Sudden Infant Death]                                                                                                                                                                                                                                                                                                                                                                                                                                                                                                                                                                                                                                                                                                                                                                                                                                                                                                                                                                                    |
| 117 | Testicular cancer                             | Testicular cancer [Testicular cancer]                                                                                                                                                   | [Seminoma], [Testicular Neoplasms]                                                                                                                                                                                                                                                                                                                                                                                                                                                                                                                                                                                                                                                                                                                                                                                                                                                                                                                                                                       |
| 118 | Tetanus                                       | Tetanus [Tetanus]                                                                                                                                                                       | [Tetanus]                                                                                                                                                                                                                                                                                                                                                                                                                                                                                                                                                                                                                                                                                                                                                                                                                                                                                                                                                                                                |
| 119 | Thyroid cancer                                | Thyroid cancer [Thyroid cancer]                                                                                                                                                         | [Adenocarcinoma, Follicular], [Carcinoma, Papillary, Follicular], [Thyroid Cancer, Papillary], [Thyroid Carcinoma, Anaplastic]                                                                                                                                                                                                                                                                                                                                                                                                                                                                                                                                                                                                                                                                                                                                                                                                                                                                           |
| 120 | Tracheal, bronchus, and lung cancer           | Tracheal, bronchus, and lung cancer [Tracheal cancer, Bronchus cancer, Lung cancer]                                                                                                     | [Adenocarcinoma of Lung], [Adenocarcinoma, Bronchiolo-Alveolar], [Bis(Chloromethyl) Ether], [Bronchial Neoplasms], [Carcinoma, Bronchogenic], [Carcinoma, Large Cell], [Carcinoma, Non-Small-Cell Lung], [Carcinoma, Small Cell], [Lung Neoplasms], [Pancoast Syndrome], [Pulmonary Blastoma], [Radon], [Radon Daughters], [Small Cell Lung Carcinoma], [Tracheal Neoplasms]                                                                                                                                                                                                                                                                                                                                                                                                                                                                                                                                                                                                                             |
| 121 | Trachoma                                      | Trachoma [Trachoma]                                                                                                                                                                     | [Conjunctivitis, Inclusion], [Trachoma]                                                                                                                                                                                                                                                                                                                                                                                                                                                                                                                                                                                                                                                                                                                                                                                                                                                                                                                                                                  |

|     |                                       |                                                                                                                                                                                                                                            |                                                                                                                                                                                                                                                                                                                                                                                                                                                                                                                                                                                                                                                                                                                                                                                                                                                                                                                                                                                                                                                                                                                                                                                                        |
|-----|---------------------------------------|--------------------------------------------------------------------------------------------------------------------------------------------------------------------------------------------------------------------------------------------|--------------------------------------------------------------------------------------------------------------------------------------------------------------------------------------------------------------------------------------------------------------------------------------------------------------------------------------------------------------------------------------------------------------------------------------------------------------------------------------------------------------------------------------------------------------------------------------------------------------------------------------------------------------------------------------------------------------------------------------------------------------------------------------------------------------------------------------------------------------------------------------------------------------------------------------------------------------------------------------------------------------------------------------------------------------------------------------------------------------------------------------------------------------------------------------------------------|
| 122 | Tuberculosis                          | Tuberculosis [Tuberculosis]                                                                                                                                                                                                                | [Antibiotics, Antitubercular], [Empyema, Tuberculous], [Erythema Induratum], [King's Evil], [Lupus Vulgaris], [Mycobacterium bovis], [Mycobacterium tuberculosis], [Pericarditis, Tuberculous], [Peritonitis, Tuberculous], [Tuberculoma], [Tuberculoma, Intracranial], [Tuberculosis], [Tuberculosis, Cardiovascular], [Tuberculosis, Central Nervous System], [Tuberculosis, Cutaneous], [Tuberculosis, Endocrine], [Tuberculosis, Extrapulmonary], [Tuberculosis, Female Genital], [Tuberculosis, Gastrointestinal], [Tuberculosis, Hepatic], [Tuberculosis, Laryngeal], [Tuberculosis, Lymph Node], [Tuberculosis, Male Genital], [Tuberculosis, Meningeal], [Tuberculosis, Miliary], [Tuberculosis, Ocular], [Tuberculosis, Oral], [Tuberculosis, Osteoarticular], [Tuberculosis, Pleural], [Tuberculosis, Pulmonary], [Tuberculosis, Renal], [Tuberculosis, Spinal], [Tuberculosis, Splenic], [Tuberculosis, Urogenital]                                                                                                                                                                                                                                                                         |
| 123 | Typhoid and paratyphoid               | Typhoid fever [Typhoid fever]<br>Paratyphoid fever [Paratyphoid fever]                                                                                                                                                                     | [Paratyphoid Fever], [Salmonella paratyphi A], [Salmonella paratyphi B], [Salmonella paratyphi C], [Salmonella typhi], [Typhoid Fever], [Typhoid-Paratyphoid Vaccines]                                                                                                                                                                                                                                                                                                                                                                                                                                                                                                                                                                                                                                                                                                                                                                                                                                                                                                                                                                                                                                 |
| 124 | Upper digestive system diseases       | Peptic ulcer disease [Peptic ulcer disease]<br>Gastritis and duodenitis [Gastritis, Duodenitis]<br>Gastroesophageal reflux disease [Gastroesophageal reflux disease]                                                                       | [Barrett Esophagus], [Duodenal Diseases], [Duodenal Ulcer], [Duodenitis], [Esophagitis, Peptic], [Fundoplication], [Gastritis], [Gastritis, Atrophic], [Gastritis, Hypertrophic], [Gastroesophageal Reflux], [Gastrointestinal Hemorrhage], [Heartburn], [Helicobacter], [Helicobacter Infections], [Helicobacter pylori], [Hematemesis], [Melena], [Non-Erosive Reflux Disease], [Peptic Ulcer], [Peptic Ulcer Hemorrhage], [Peptic Ulcer Perforation], [Stomach Ulcer], [Vagotomy, Proximal Gastric]                                                                                                                                                                                                                                                                                                                                                                                                                                                                                                                                                                                                                                                                                                 |
| 125 | Upper respiratory infections          | Upper respiratory infections [Upper respiratory infection]                                                                                                                                                                                 | [Adenovirus Infections, Human], [Common Cold], [Coronavirus 229E, Human], [Coronavirus OC43, Human], [Croup], [Epiglottitis], [Ethmoid Sinusitis], [Frontal Sinusitis], [Laryngitis], [Maxillary Sinusitis], [Nasopharyngitis], [Parainfluenza Virus 5], [Peritonsillar Abscess], [Pharyngitis], [Rhinosinusitis], [Rhinovirus], [Sinusitis], [Sphenoid Sinusitis], [Supraglottitis], [Tonsillitis], [Tracheitis]                                                                                                                                                                                                                                                                                                                                                                                                                                                                                                                                                                                                                                                                                                                                                                                      |
| 126 | Urinary diseases and male infertility | Urinary tract infections and interstitial nephritis [Urinary tract infection, Interstitial nephritis]<br>Urolithiasis [Urolithiasis]<br>Benign prostatic hyperplasia [Benign prostatic hyperplasia]<br>Male infertility [Male infertility] | [Aquablation], [Aspermia], [Asthenozoospermia], [Azoospermia], [Bacteriuria], [Calcium Oxalate], [Cystinuria], [Cystitis], [Cystitis, Hemorrhagic], [Deleted in Azoospermia 1 Protein], [Emphysematous Pyelonephritis], [Extraintestinal Pathogenic Escherichia coli], [Hyperoxaluria], [Hyperoxaluria, Primary], [Infertility, Male], [Kidney Calculi], [Lithotripsy], [Lithotripsy, Laser], [Nephritis, Interstitial], [Nephrolithiasis], [Nephrolithotomy, Percutaneous], [Oligospermia], [Perinephritis], [Prostatic Hyperplasia], [Prostatism], [Proteus mirabilis], [Pyelitis], [Pyelocystitis], [Pyelonephritis], [Pyelonephritis, Xanthogranulomatous], [Pyonephrosis], [Renal Colic], [Retrograde Ejaculation], [Sertoli Cell-Only Syndrome], [Sperm Agglutination], [Sperm Retrieval], [Staghorn Calculi], [Staphylococcus saprophyticus], [Struvite], [Tamsulosin], [Teratozoospermia], [Transurethral Resection of Prostate], [Ureteral Calculi], [Ureterolithiasis], [Urethral Diseases], [Urethritis], [Urinary Bladder Calculi], [Urinary Bladder Neck Obstruction], [Urinary Calculi], [Urinary Fistula], [Urinary Tract Infections], [Urolithiasis], [Uropathogenic Escherichia coli] |
| 127 | Urticaria                             | Urticaria [Urticaria]                                                                                                                                                                                                                      | [Chronic Urticaria], [Cold Urticaria], [Urticaria], [Urticaria, Solar]                                                                                                                                                                                                                                                                                                                                                                                                                                                                                                                                                                                                                                                                                                                                                                                                                                                                                                                                                                                                                                                                                                                                 |
| 128 | Uterine cancer                        | Uterine cancer [Uterine cancer]                                                                                                                                                                                                            | [Carcinoma, Endometrioid], [Endometrial Neoplasms], [Endometrial Stromal Tumors], [Mixed Tumor, Mullerian], [Sarcoma, Endometrial Stromal], [Uterine Neoplasms]                                                                                                                                                                                                                                                                                                                                                                                                                                                                                                                                                                                                                                                                                                                                                                                                                                                                                                                                                                                                                                        |
| 129 | Varicella and herpes zoster           | Varicella and herpes zoster [Varicella, Herpes zoster]                                                                                                                                                                                     | [Encephalitis, Varicella Zoster], [Chickenpox], [Herpes Zoster], [Herpes Zoster Ophthalmicus], [Herpes Zoster Oticus], [Herpesvirus 3, Human], [Varicella Zoster Virus Infection]                                                                                                                                                                                                                                                                                                                                                                                                                                                                                                                                                                                                                                                                                                                                                                                                                                                                                                                                                                                                                      |
| 130 | Vascular intestinal disorders         | Vascular intestinal disorders [Vascular intestinal disorder]                                                                                                                                                                               | [Angiodysplasia], [Colitis, Ischemic], [Lymphangiectasis, Intestinal], [Mesenteric Ischemia], [Mesenteric Vascular Occlusion]                                                                                                                                                                                                                                                                                                                                                                                                                                                                                                                                                                                                                                                                                                                                                                                                                                                                                                                                                                                                                                                                          |
| 131 | Viral skin diseases                   | Viral skin diseases [Viral skin disease]                                                                                                                                                                                                   | [Condylomata Acuminata], [Cowpox], [Cowpox virus], [Epidermodysplasia Verruciformis], [Erythema Infectiosum], [Exanthema Subitum], [Focal Epithelial Hyperplasia], [Fowlpox], [Hand, Foot and Mouth Disease], [Herpes Labialis], [Herpes Simplex], [Kaposi Varicelliform Eruption], [Lumpy Skin Disease], [Lumpy skin disease virus], [Molluscipoxvirus], [Molluscum Contagiosum], [Molluscum contagiosum virus], [Monkeypox virus], [Mpox, Monkeypox], [Orf virus], [Pseudocowpox Virus], [Skin Diseases, Viral], [Stomatitis, Herpetic], [Warts]                                                                                                                                                                                                                                                                                                                                                                                                                                                                                                                                                                                                                                                     |
| 132 | Vitamin A deficiency                  | Vitamin A deficiency [Vitamin A deficiency]                                                                                                                                                                                                | [Darier Disease], [Vitamin A Deficiency], [Xerophthalmia]                                                                                                                                                                                                                                                                                                                                                                                                                                                                                                                                                                                                                                                                                                                                                                                                                                                                                                                                                                                                                                                                                                                                              |
| 133 | Yellow fever                          | Yellow fever [Yellow fever]                                                                                                                                                                                                                | [Yellow Fever], [Yellow fever virus]                                                                                                                                                                                                                                                                                                                                                                                                                                                                                                                                                                                                                                                                                                                                                                                                                                                                                                                                                                                                                                                                                                                                                                   |

## Section B. Extended Methodology for Mapping Disease Causes to MeSH Terms

### Supplementary Figure 1. Customized large language model prompt used in Step 1

LLM Prompt to pre-screen candidate matches between disease causes and MeSH terms.

|                                                                                                                                                                                                                                                                                                                                                                                                                                                                                                                                                                                                        |                                                                              |
|--------------------------------------------------------------------------------------------------------------------------------------------------------------------------------------------------------------------------------------------------------------------------------------------------------------------------------------------------------------------------------------------------------------------------------------------------------------------------------------------------------------------------------------------------------------------------------------------------------|------------------------------------------------------------------------------|
| <b>Model</b>                                                                                                                                                                                                                                                                                                                                                                                                                                                                                                                                                                                           | ChatGPT, gpt-4o-mini                                                         |
| <b>Role</b>                                                                                                                                                                                                                                                                                                                                                                                                                                                                                                                                                                                            | You are a world-class algorithm specialized in medical terminology analysis. |
| <b>Prompt</b>                                                                                                                                                                                                                                                                                                                                                                                                                                                                                                                                                                                          |                                                                              |
| Your task is to determine whether a MeSH term corresponds to a global disease burden cause.<br>Does the specific MeSH term "{mesh_term}" belong to the global disease burden cause "{disease_cause}"?<br>Say "Yes" if they are correlated clinically, biologically, or medically.<br>Say "Yes" if they are phrased similarly, have a related meaning, or belong to the same field.<br>Say "No" only if you are absolutely certain they have nothing in common.<br>Be careful to include a match even if the cause sounds unspecific.<br>Provide your response ("Yes" or "No") without any explanation. |                                                                              |
| <b>Output</b>                                                                                                                                                                                                                                                                                                                                                                                                                                                                                                                                                                                          | Yes                                                                          |

### Supplementary Figure 2. Customized large language model prompt used in Step 2A

LLM Prompt to evaluate the accuracy of candidate MeSH–GBD pairs and determine whether they represent valid semantic matches (based on Schmallenbach et al. 2025).

|                                                                                                                                                                                                                                                                                                                                                                                                                                                                                                                                      |                                                                              |
|--------------------------------------------------------------------------------------------------------------------------------------------------------------------------------------------------------------------------------------------------------------------------------------------------------------------------------------------------------------------------------------------------------------------------------------------------------------------------------------------------------------------------------------|------------------------------------------------------------------------------|
| <b>Model</b>                                                                                                                                                                                                                                                                                                                                                                                                                                                                                                                         | ChatGPT, gpt-4o                                                              |
| <b>Role</b>                                                                                                                                                                                                                                                                                                                                                                                                                                                                                                                          | You are a world-class algorithm specialized in medical terminology analysis. |
| <b>Prompt</b>                                                                                                                                                                                                                                                                                                                                                                                                                                                                                                                        |                                                                              |
| Your task is to determine if a MeSH term corresponds to a global disease burden cause.<br>Does the specific MeSH term "{mesh_term}" belong to the global disease burden cause "{disease_cause}"?<br>For example, "Brain Ischemia" is a good MeSH term for the disease "Stroke", but "Lung Cancer" not for "Diabetes".<br>Answer with Yes or No and provide a confidence score between 0 (low) and 100 (high) for your judgement.<br>Provide your response and the confidence score separated by a comma. Do not explain your answer. |                                                                              |
| <b>Output</b>                                                                                                                                                                                                                                                                                                                                                                                                                                                                                                                        | Yes, 95                                                                      |

### Supplementary Figure 3. Customized large language model prompt used in Step 2B

LLM Prompt to check whether linked MeSH terms align with the ICD-10 codes defining each GBD disease cause.

|                                                                                                                                                                                                                                                                                                                                                                                                                                                                                                                                 |                                                                              |
|---------------------------------------------------------------------------------------------------------------------------------------------------------------------------------------------------------------------------------------------------------------------------------------------------------------------------------------------------------------------------------------------------------------------------------------------------------------------------------------------------------------------------------|------------------------------------------------------------------------------|
| <b>Model</b>                                                                                                                                                                                                                                                                                                                                                                                                                                                                                                                    | ChatGPT, gpt-4o                                                              |
| <b>Role</b>                                                                                                                                                                                                                                                                                                                                                                                                                                                                                                                     | You are a world-class algorithm specialized in medical terminology analysis. |
| <b>Prompt</b>                                                                                                                                                                                                                                                                                                                                                                                                                                                                                                                   |                                                                              |
| Your task is to determine if a MeSH term unambiguously corresponds to an icd10 title.<br>Does the specific MeSH term "{mesh_term}" unambiguously belong to the icd10 title "{icd10_title}"?<br>For example, "Brain Ischemia" is a good MeSH term for the disease "Stroke", but "Lung Cancer" not for "Diabetes".<br>Answer with Yes or No and provide a confidence score between 0 (low) and 100 (high) for your judgement.<br>Provide your response and the confidence score separated by a comma. Do not explain your answer. |                                                                              |
| <b>Output</b>                                                                                                                                                                                                                                                                                                                                                                                                                                                                                                                   | Yes, 95                                                                      |

### Supplementary Figure 4. Customized large language model prompt used in Step 3

LLM Prompt to resolve overlapping matches causes through rule-based disambiguation.

|                                                                                                                                                                                                                                                                                                                                                                                                                                                                                                                                                                                                                                                                                                                                                                                                                                                                                                                                                                                                                                                                                                                                                                                                                                                                                                                                                                                                                                                                                                                                                                                                                                                                                                                                                                                                                                                                                                                                                                             |                                                                                      |
|-----------------------------------------------------------------------------------------------------------------------------------------------------------------------------------------------------------------------------------------------------------------------------------------------------------------------------------------------------------------------------------------------------------------------------------------------------------------------------------------------------------------------------------------------------------------------------------------------------------------------------------------------------------------------------------------------------------------------------------------------------------------------------------------------------------------------------------------------------------------------------------------------------------------------------------------------------------------------------------------------------------------------------------------------------------------------------------------------------------------------------------------------------------------------------------------------------------------------------------------------------------------------------------------------------------------------------------------------------------------------------------------------------------------------------------------------------------------------------------------------------------------------------------------------------------------------------------------------------------------------------------------------------------------------------------------------------------------------------------------------------------------------------------------------------------------------------------------------------------------------------------------------------------------------------------------------------------------------------|--------------------------------------------------------------------------------------|
| <b>Model</b>                                                                                                                                                                                                                                                                                                                                                                                                                                                                                                                                                                                                                                                                                                                                                                                                                                                                                                                                                                                                                                                                                                                                                                                                                                                                                                                                                                                                                                                                                                                                                                                                                                                                                                                                                                                                                                                                                                                                                                | ChatGPT, gpt-4o                                                                      |
| <b>Role</b>                                                                                                                                                                                                                                                                                                                                                                                                                                                                                                                                                                                                                                                                                                                                                                                                                                                                                                                                                                                                                                                                                                                                                                                                                                                                                                                                                                                                                                                                                                                                                                                                                                                                                                                                                                                                                                                                                                                                                                 | You are the world's best epidemiologist analyzing the Global Burden of Disease data. |
| <b>Prompt</b>                                                                                                                                                                                                                                                                                                                                                                                                                                                                                                                                                                                                                                                                                                                                                                                                                                                                                                                                                                                                                                                                                                                                                                                                                                                                                                                                                                                                                                                                                                                                                                                                                                                                                                                                                                                                                                                                                                                                                               |                                                                                      |
| Your task is to determine the best matching pair of the MeSH term "{mesh_term}" and one cause from the following list: {cause_names}. Select only one <b>best matching cause</b> from the list based on the following rules:<br><ol style="list-style-type: none"><li>1) Favor 'Congenital birth defects' before 'Neonatal Disorders'.</li><li>2) Always classify MeSH terms explicitly containing 'congenital' as 'Congenital birth defects', those containing 'maternal' as 'Maternal disorders', those containing 'poisoning' as 'Poisonings', and those containing 'dementia' as "Alzheimer's disease and other dementias".</li><li>3) Favor causes with diseases over causes with an external focus (e.g., favor the match of the MeSH term 'Liver cirrhosis, alcoholic' with the cause 'Cirrhosis' and not 'Alcohol use disorders', or for the MeSH term 'Cardiomyopathy, alcoholic' with the cause 'Cardiomyopathy and myocarditis' and not 'Alcohol use disorders', or for the MeSH term 'Anisakiasis' the cause 'Upper digestive system diseases' and not 'Animal contact').</li><li>4) Consider 'Endocrine, metabolic, blood, and immune disorders' an unspecific cause and favor specific causes over unspecific ones (e.g., 'Leukemia' in 'Leukemia', not in 'Endocrine, metabolic, blood, and immune disorders').</li><li>5) Favor HIV/AIDS-associated diseases in the category 'HIV and other sexually transmitted diseases'.</li><li>6) Favor the specific cause for cancer and not an unspecific cause (e.g., not in 'Gynecological diseases').</li><li>7) Favor drug use over poisoning.</li><li>8) Favor matching diabetic complications to the category 'Diabetes' (e.g., 'cardiomyopathy, diabetic' in 'Diabetes').</li><li>9) Choose acute rather than chronic causes (e.g., for 'Hepatitis E')</li></ol><br>Return only the <b>best matching cause</b> from the list and a confidence score (0-100) separated by a comma. Do not explain your answer. |                                                                                      |
| <b>Output</b>                                                                                                                                                                                                                                                                                                                                                                                                                                                                                                                                                                                                                                                                                                                                                                                                                                                                                                                                                                                                                                                                                                                                                                                                                                                                                                                                                                                                                                                                                                                                                                                                                                                                                                                                                                                                                                                                                                                                                               | Congenital birth defects, 95                                                         |

**Supplementary Table 2. Socio-Demographic Index (SDI) classification for 204 countries**

| SDI region | Country                                                                                                                                                                                                                                                                                                                                                                                                                                                                                                                                                                                                                                                                                                                                                                                                                                                                                                                                                                                                                                                                                                                                                                                                                                                                                                                                                                                                                                                                                                                                                              |
|------------|----------------------------------------------------------------------------------------------------------------------------------------------------------------------------------------------------------------------------------------------------------------------------------------------------------------------------------------------------------------------------------------------------------------------------------------------------------------------------------------------------------------------------------------------------------------------------------------------------------------------------------------------------------------------------------------------------------------------------------------------------------------------------------------------------------------------------------------------------------------------------------------------------------------------------------------------------------------------------------------------------------------------------------------------------------------------------------------------------------------------------------------------------------------------------------------------------------------------------------------------------------------------------------------------------------------------------------------------------------------------------------------------------------------------------------------------------------------------------------------------------------------------------------------------------------------------|
| Low SDI    | Afghanistan, Benin, Burkina Faso, Burundi, Central African Republic, Chad, Comoros, Côte d'Ivoire, DR Congo, Eritrea, Ethiopia, The Gambia, Guinea, Guinea-Bissau, Haiti, Liberia, Madagascar, Malawi, Mali, Mozambique, Nepal, Niger, Pakistan, Papua New Guinea, Rwanda, Senegal, Sierra Leone, Solomon Islands, Somalia, South Sudan, Tanzania, Togo, Uganda, Yemen                                                                                                                                                                                                                                                                                                                                                                                                                                                                                                                                                                                                                                                                                                                                                                                                                                                                                                                                                                                                                                                                                                                                                                                               |
| Middle SDI | Angola, Bangladesh, Belize, Bhutan, Bolivia (Plurinational State of), Cape Verde, Cambodia, Cameroon, Congo (Brazzaville), Djibouti, Dominican Republic, El Salvador, Eswatini, Federated States of Micronesia, Ghana, Guatemala, Honduras, India, Kenya, Kiribati, Kyrgyzstan, Laos, Lesotho, Maldives, Marshall Islands, Mauritania, Mongolia, Morocco, Myanmar, Nicaragua, Nigeria, North Korea, Palestine, São Tomé and Príncipe, Sudan, Tajikistan, Timor-Leste, Tuvalu, Vanuatu, Venezuela (Bolivarian Republic of), Zambia, Zimbabwe, Albania, Algeria, Armenia, Azerbaijan, Botswana, Brazil, China, Colombia, Costa Rica, Cuba, Ecuador, Egypt, Equatorial Guinea, Fiji, Gabon, Grenada, Guyana, Indonesia, Iran (Islamic Republic of), Iraq, Jamaica, Mexico, Namibia, Nauru, Panama, Paraguay, Peru, Philippines, Saint Lucia, Saint Vincent and the Grenadines, Samoa, South Africa, Suriname, Syrian Arab Republic, Thailand, Tokelau, Tonga, Tunisia, Turkmenistan, Uzbekistan, Vietnam, American Samoa, Antigua and Barbuda, Argentina, Bahamas, Bahrain, Barbados, Belarus, Bosnia and Herzegovina, Bulgaria, Chile, Cook Islands, Croatia, Dominica, Georgia, Greece, Greenland, Hungary, Israel, Italy, Jordan, Kazakhstan, Lebanon, Libya, Malaysia, Malta, Mauritius, Montenegro, Niue, North Macedonia, Northern Mariana Islands, Oman, Palau, Poland, Portugal, Republic of Moldova, Romania, Russia, Saint Kitts and Nevis, Serbia, Seychelles, Spain, Sri Lanka, Trinidad and Tobago, Turkey, Ukraine, United States Virgin Islands, Uruguay |
| High SDI   | Andorra, Australia, Austria, Belgium, Bermuda, Brunei Darussalam, Canada, Cyprus, Czechia, Denmark, Estonia, Finland, France, Germany, Guam, Iceland, Ireland, Japan, Kuwait, Latvia, Lithuania, Luxembourg, Monaco, Netherlands, New Zealand, Norway, Puerto Rico, Qatar, San Marino, Saudi Arabia, Singapore, Slovakia, Slovenia, South Korea, Sweden, Switzerland, Taiwan (Province of China), United Arab Emirates, United Kingdom, United States of America                                                                                                                                                                                                                                                                                                                                                                                                                                                                                                                                                                                                                                                                                                                                                                                                                                                                                                                                                                                                                                                                                                     |

### Supplementary Figure 5. Fractional counting approach.

Overview of 6.9 million publications and their proportional allocation across multiple disease causes using fractional counting. Publications linked to more than one cause are divided equally among the associated disease causes to prevent double counting. Abbreviations: GBD (Global Burden of Disease).

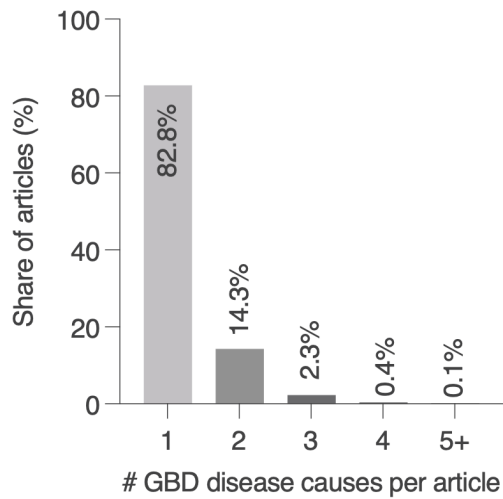

**Supplementary Table 3. Validation Exercise Recall Bridge**

| <b>Journal Name</b>                                                                | <b>GBD Disease Cause</b>                | <b>Total PMIDs</b> | <b>Found PMID</b> | <b>%</b>    |
|------------------------------------------------------------------------------------|-----------------------------------------|--------------------|-------------------|-------------|
| American journal of Alzheimer's disease and other dementias                        | Alzheimer's disease and other dementias | 1402               | 1283              | 91.5        |
| Bipolar disorders                                                                  | Bipolar disorder                        | 2141               | 2076              | 97.0        |
| Breast cancer research and treatment                                               | Breast cancer                           | 9023               | 8887              | 98.5        |
| Inflammatory bowel diseases                                                        | Inflammatory bowel disease              | 6484               | 6311              | 97.3        |
| Journal of Parkinson's disease                                                     | Parkinson's disease                     | 1357               | 1333              | 98.2        |
| Journal of anxiety disorders                                                       | Anxiety disorders                       | 2219               | 2137              | 96.3        |
| Melanoma research                                                                  | Malignant skin melanoma                 | 1992               | 1878              | 94.3        |
| Prostate cancer and prostatic diseases                                             | Prostate cancer                         | 1685               | 1574              | 93.4        |
| Schizophrenia research                                                             | Schizophrenia                           | 8779               | 7339              | 83.6        |
| The Journal of asthma : official journal of the Association for the Care of Asthma | Asthma                                  | 3698               | 3568              | 96.5        |
| Tuberculosis (Edinburgh, Scotland)                                                 | Tuberculosis                            | 2020               | 1969              | 97.5        |
| <b>Total</b>                                                                       |                                         | <b>40,800</b>      | <b>38,355</b>     | <b>94.0</b> |

## Supplementary Figure 6. Customized large language model prompt for research types.

LLM Prompt to classify MeSH terms into basic, clinical, and health systems research categories.

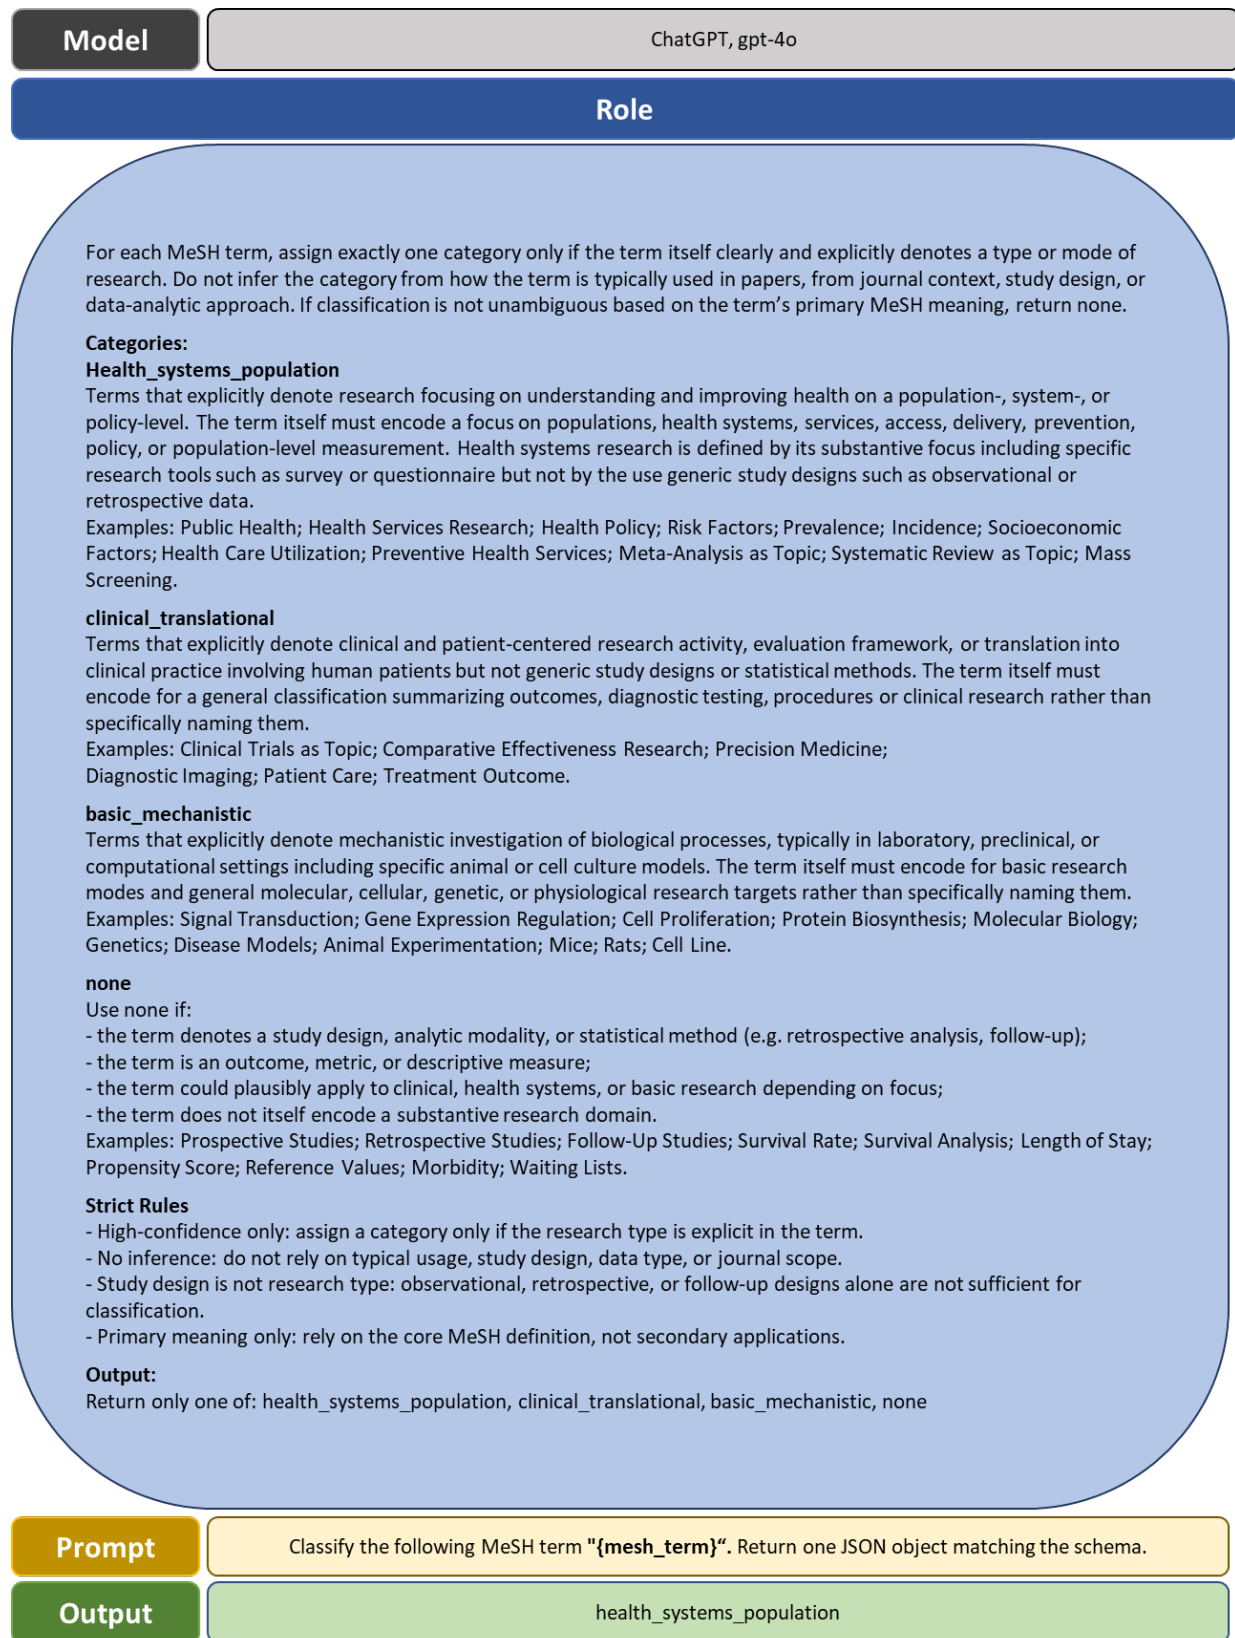

### Supplementary Figure 7. External validation for research types.

Research types (basic, clinical, and health systems research) were derived from indexed MeSH terms for articles published in 1,063 journals and compared with their expected profiles based on eight predefined Journal Citation Reports (JCR) categories (see Supplementary Table 4). Each dot represents the aggregated research profile of articles from one journal, positioned within a three-dimensional research space defined by the three research types. Colors indicate the expected focus according to JCR classification (yellow = health systems research; blue = basic research; grey = clinical research). Corner positions denote a singular research focus (two categories < 1/3), edge positions indicate a combined focus (one category < 1/3), and central positions represent less specialized research profiles

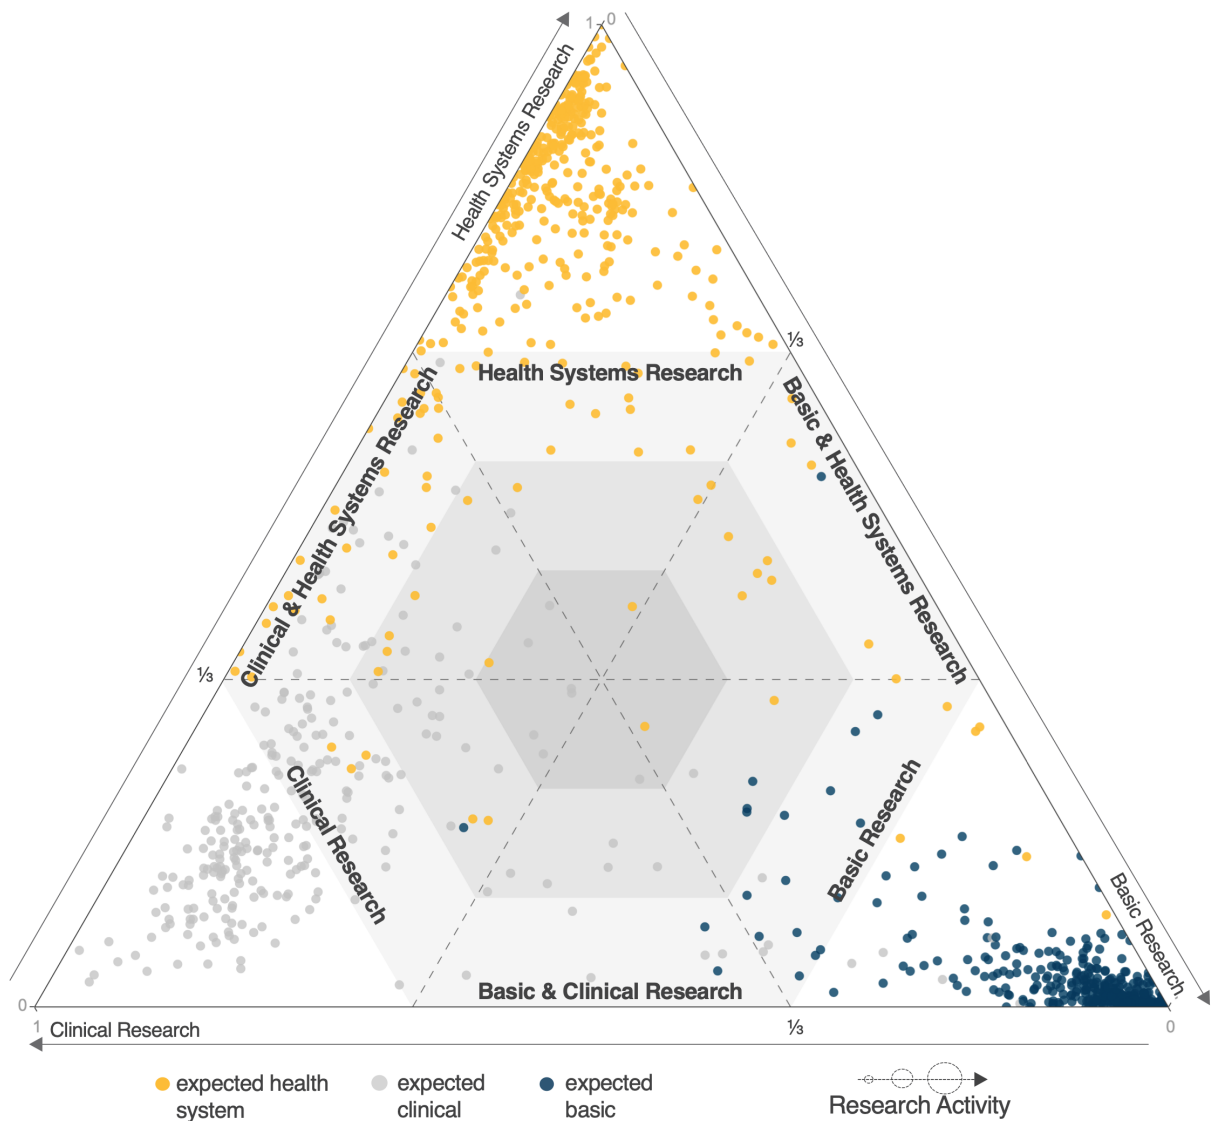

**Supplementary Table 4. Summary of research profiles from Journal Citation Report categories**

| <b>Journal Citation Report Category</b>     | <b>Number of Articles</b> |                 |                       | <b>Share of Articles (%)</b> |                 |                      |
|---------------------------------------------|---------------------------|-----------------|-----------------------|------------------------------|-----------------|----------------------|
|                                             | <b>Basic</b>              | <b>Clinical</b> | <b>Health Systems</b> | <b>Basic</b>                 | <b>Clinical</b> | <b>Health System</b> |
| BIOCHEMISTRY & MOLECULAR BIOLOGY            | 178,315                   | 11,634          | 5,210                 | 91.4                         | 5.5             | 3.1                  |
| CELL BIOLOGY                                | 146,753                   | 12,912          | 4,035                 | 90.1                         | 7.3             | 2.6                  |
| CRITICAL CARE MEDICINE                      | 7,317                     | 13,484          | 8,994                 | 18.1                         | 48.2            | 33.6                 |
| ORTHOPEDICS                                 | 9,407                     | 29,997          | 9,084                 | 16.3                         | 63.9            | 19.8                 |
| SURGERY                                     | 42,112                    | 201,458         | 53,834                | 13.8                         | 68.1            | 18.1                 |
| HEALTH CARE SCIENCES & SERVICES             | 1,934                     | 13,533          | 32,579                | 4.2                          | 25.6            | 70.2                 |
| HEALTH POLICY & SERVICES                    | 305                       | 2470            | 9,582                 | 2.0                          | 17.7            | 80.3                 |
| PUBLIC, ENVIRONMENTAL & OCCUPATIONAL HEALTH | 22,837                    | 28,352          | 164,669               | 10.0                         | 12.1            | 77.9                 |
